# Supplementary material
Source: PubMed Central journal article supplement (PMC3890788)
Supplement: 1301740111_sapp.pdf [file 1301740111_sapp.pdf]

## Supplementary Information

### Identification of Secreted Bacterial Proteins by Non-Canonical Amino Acid Tagging

**Authors:** Alborz Mahdavi<sup>a,b</sup>, Janek Szychowski<sup>a</sup>, John T. Ngo<sup>a</sup>, Michael J. Sweredoski<sup>c</sup>, Robert L.J. Graham<sup>c</sup>, Sonja Hess<sup>c</sup>, Olaf Schneewind<sup>d</sup>, Sarkis K. Mazmanian<sup>e</sup>, David A. Tirrell<sup>a,1</sup>

#### Affiliations:

<sup>a</sup> Division of Chemistry and Chemical Engineering, California Institute of Technology, Pasadena, CA 91125, USA.

<sup>b</sup> Department of Bioengineering, California Institute of Technology, Pasadena, CA 91125, USA.

<sup>c</sup> Proteome Exploration Laboratory, Beckman Institute, California Institute of Technology, Pasadena, CA 91125, USA.

<sup>d</sup> Department of Microbiology, University of Chicago, Chicago, IL 60637, USA.

<sup>e</sup> Division of Biology and Biological Engineering, California Institute of Technology, CA 91125, USA.

Corresponding author:

David A. Tirrell  
Division of Chemistry and Chemical Engineering  
California Institute of Technology  
1200 East California Blvd. MC 210-41  
Pasadena, CA, 91125  
Email: tirrell@caltech.edu  
Tel: 626-395-3140  
Fax: 626-568-8743

**Figure S1.**

**Synthesis of AnI, the Acid-Cleavable Biotin-Alkyne Affinity Enrichment Tag and Copper-Catalyzed Click Reaction**

**Synthesis of AnI by Copper-Catalyzed Diazo Transfer.** The synthesis of AnI was based on a previously published protocol (1); the starting material was Boc-lysine. Briefly, 5.27 g (81.1 mmol) of sodium azide was treated with 2.7 ml (16 mmol) of distilled triflic anhydride in 13 ml of water for 2 hours. The triflic azide product was extracted with 10 ml methylene chloride and added dropwise to a flask containing Boc-Lys-OH (2 g, 8.1 mmol), K<sub>2</sub>CO<sub>3</sub> (1.68 g, 12.2 mmol) and CuSO<sub>4</sub> (20 mg, 0.08 mmol) in 26 ml of water and 250 ml of methanol. After 20 hours at room temperature the product was extracted with ethyl acetate, redissolved in methylene chloride and purified by silica gel chromatography. After Boc deprotection with hydrochloric acid, the final product was purified by cation exchange chromatography.

**Copper-Catalyzed Click Reaction.** The copper-catalyzed azide-alkyne coupling reaction, and the synthesis of the requisite THPTA ligand were performed as described previously (2). Labeling was carried out at room temperature for 2 hours, at a final concentration of 0.2-0.5 mg/ml of HeLa lysate proteins, 0.1 mM copper sulfate, 0.5 mM THPTA ligand, 5 mM sodium ascorbate, 5 mM aminoguanidine and 100 μM alkyne probe. EDTA-free protease inhibitor (Roche) was added to all reactions and lysates.

1. Link AJ, Vink MK, & Tirrell DA (2007) Preparation of the functionalizable methionine surrogate azidohomoalanine via copper-catalyzed diazo transfer. *Nat. Protoc.* 2(8):1879-1883.

2. Hong V, Presolski SI, Ma C, & Finn MG (2009) Analysis and optimization of copper-catalyzed azide-alkyne cycloaddition for bioconjugation. *Angew. Chem. Int. Ed.* 48(52):9879-9883.

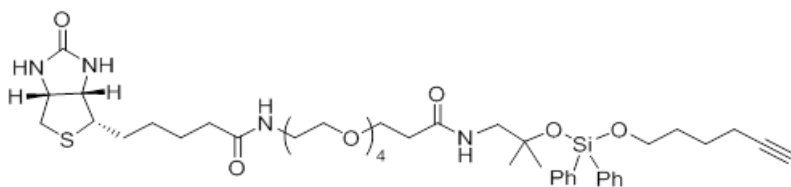

**Acid-cleavable biotin-alkyne affinity enrichment tag *N*-(2-(((hex-5-yn-1-yloxy)diphenylsilyl)oxy)-2-methylpropyl)-1-(5-((3*aS*,4*S*,6*aR*)-2-oxohexahydro-1*H*-thieno[3,4-*d*]imidazol-4-yl)pentanamido)-3,6,9,12-tetraoxapentadecan-15-amide.** Synthesis of the acid cleavable alkyne tag was based on our recent work on the analogous acid-sensitive dialkoxydiphenylsilyl biotin-azide tag (45), with the exception that hex-5-yn-1-ol was used in place of 6-azidohexanol. <sup>1</sup>H NMR (500 MHz, CDCl<sub>3</sub>), δ (ppm): 7.72-7.50 (m, 4H), 7.40 (m, 6H), 7.06-6.95 (m, 1H), 6.66 (s, 1H), 6.50 (t, *J* = 5.65, 5.65 Hz, 1H), 5.80 (s, 1H), 4.53-4.37 (m, 1H), 4.34-4.19 (m, 1H), 3.73 (td, *J* = 19.58, 6.04, 6.04 Hz, 4H), 3.65-3.48 (m, 14H), 3.48-3.35 (m, 2H), 3.35-3.22 (m, 1H), 3.11 (dd, *J* = 11.73, 7.06 Hz, 1H), 2.85 (td, *J* = 16.69, 8.51, 8.51 Hz, 1H), 2.72 (t, *J* = 10.43, 10.43 Hz, 2H), 2.41 (t, *J* = 6.01, 6.01 Hz, 2H), 2.27-2.05 (m, 4H), 1.95 (dd, *J* = 3.09, 2.17 Hz, 1H), 1.81-1.52 (m, 8H), 1.50-1.33 (m, 2H), 1.23 (d, *J* = 22.65 Hz, 6H); <sup>13</sup>C NMR (126 MHz,

CDCl<sub>3</sub>, δ (ppm): 173.5, 171.2, 164.1, 134.8 (m, 6C), 130.2 (m, 2C), 127.9 (m, 4C), 84.3, 75.7, 70.4 (m, 8C), 68.6, 67.3, 62.6, 61.8, 60.2, 55.7, 50.4, 40.5, 39.1, 37.1, 35.9, 31.3, 28.3, 28.0, 27.6, 25.6, 24.8, 18.1; *m/z* calculated for C<sub>43</sub>H<sub>67</sub>N<sub>7</sub>O<sub>9</sub>SSi [M+H]<sup>+</sup>: 840.4163, MS found: 863.6 (M+Na). HRMS found: 863.4228.

NMR spectra of acid-cleavable biotin-alkyne tag (top, <sup>1</sup>H NMR spectrum; bottom, <sup>13</sup>C NMR spectrum)

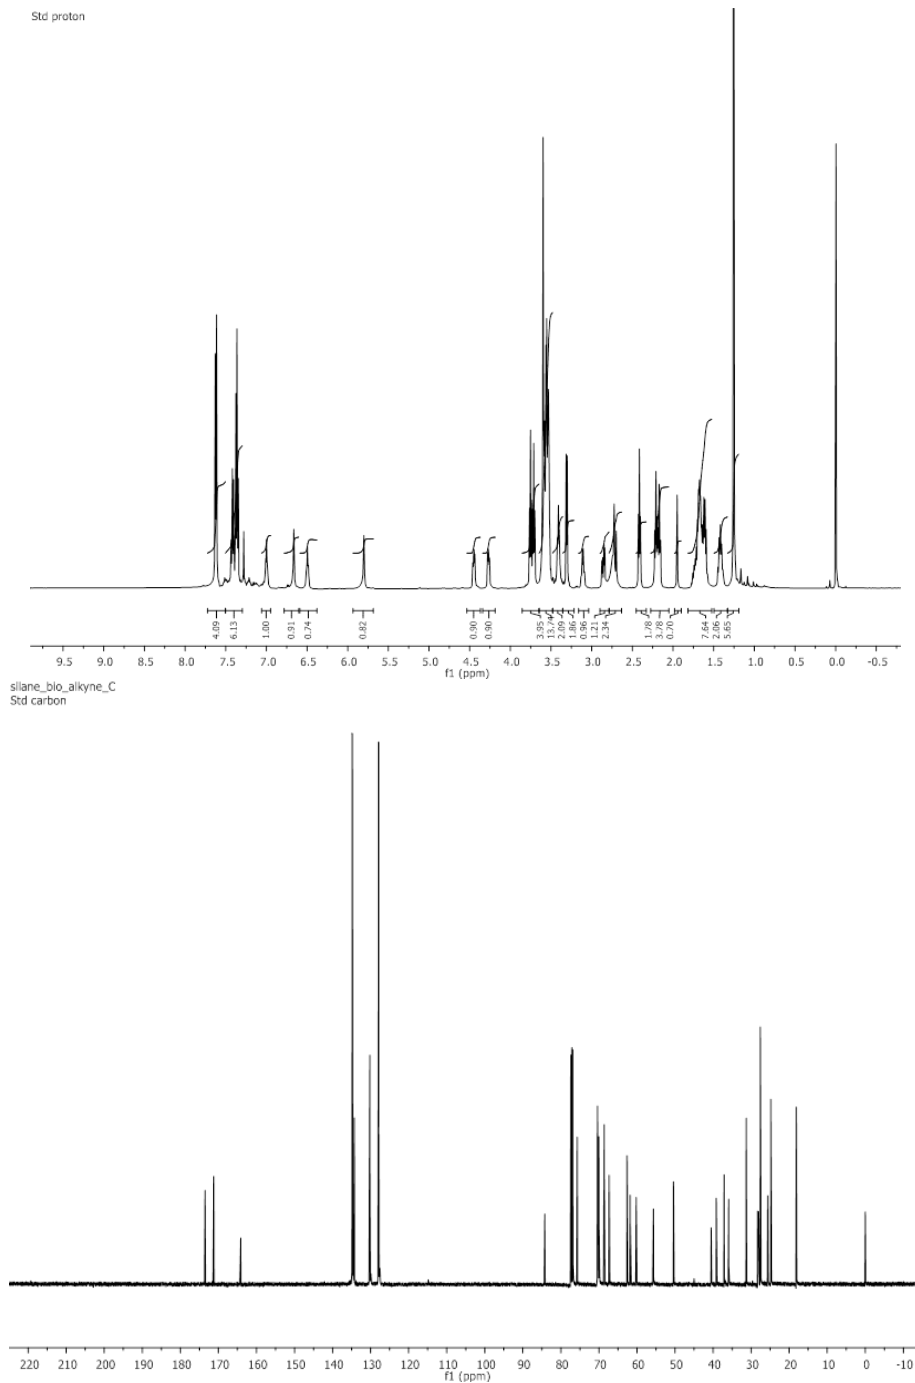

**Figure S2.**

**Mass shifts at methionine positions as a result of Anl incorporation and addition of cleavable tag.** Mass modifications associated with replacement of Met by Anl, with reaction of Anl with the biotin-alkyne affinity enrichment tag, and with cleavage of the tag by formic acid are represented. These three mass modifications are included as variable modifications for tandem mass spectrometry.

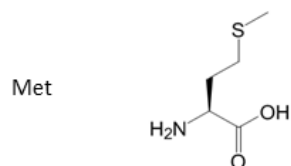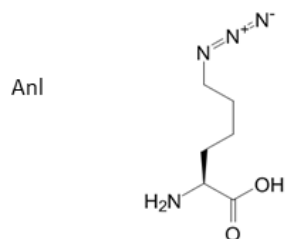

Mass modification 1: Met to Anl ( $\Delta=172.10-149.05=+23.05$ )

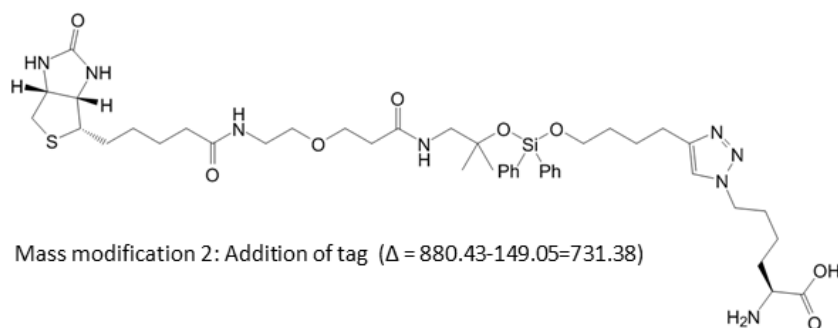

Mass modification 2: Addition of tag ( $\Delta = 880.43-149.05=731.38$ )

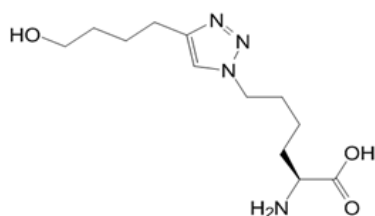

Mass modification 3: Cleaved tagged Anl ( $\Delta = 270.17-149.05=121.12$ )

**Figure S3.**

**Sequence of the NLL-MetRS expression construct.** DNA sequence of the NheI-flanked expression cassette with NLL-MetRS under control of the *E. coli* MetG promoter and followed by its natural *E. coli* transcriptional termination signal. The MetRS sequence is underlined. Mutations L13N, Y260L, H301L are highlighted in green.

GCTAGCTCTAGAGACGTCCGGCCGGAGCTCCACCGCGGTGGCGGCCGCTCTAGAGTCACTTACTTAACATTTCCCATTTGGTACTATCTAACCCCTTTTCACTATTAAGAAGTAATGCCTACTATGACTCAAGTCGCGAAGAAAATTCTGGTGACGTGCGCAAAACCGGTACGCTAACGGCTCAATCCACCTCGGCCATATGCTGGAGCACATCCAGGCTGATGTCTGGGTCCGTTACCAGCGAATGCGCGGCCACGAGGTCAACTTCATCTGCGCCGACGATGCCACGGTACACCGATCATGCTGAAAGCTCAGCAGCTTGGTATCACCCGGAGCAGATGATTGGCGAAATGAGTCAGGAGCATCAGACTGATTCGCAGGCTTTAACATCAGCTATGACAACCTCACTCGACGCACAGCGAAGAGAACCGCCAGTTGTCAGAACTTATCTACTCTCGCCTGAAAGAAAACGGTTTTTATTA AAAACCGCACCATCTCTCAGCTGTACGATCCGGAAAAAGGCATGTTCTCTGCCGGACCGTTTTGTGAAAGGCCA CCTGCCCGAAATGTAATCCCGGATCAATACGCGGATAAAGTGCAGTCTGCGGCGCGACCTACAGCCCGACTGAACTGATCGAGCCGAAA TCGGTGGTTTCTGGCGCTACGCCGGTAATGCGTGATTCTGAACACTTCTTTTGATCTGCCCTCTTCAGCGAAATGTTGACGGCATGGACCC GCAGCGGTGCGTTGCAGGAGCAGGTGGCAAATAAAATGCAGGAGTGGTTGAATCTGGCCTGCAACAGTGGGATATCTCCCGCGACGCCCC TTACTTCGGTTTTGAAATCCGAACGCGCCGGGCAAATTTCTACGCTGGCTGGACGCACCGATTGGCCTGATGGGTTCTTTCAAGAATCTG TGCACAAGCAGCGCGACAGCGTAAGCTTCGATGAATACTGGAAGAAAGACTCCACCGCCGAGCTGTACCACTTCATCGGTAAGATATTGT TTACTTCCTGAGCCTGTTCTGGCCTGCCATGCTGGAAGGCAGCAACTCCGCAAGCCGTCACACTGTTTGTTCATGGCTATGTGACGGTGAA CGGCGCAAAGATGTCCAAGTCTCGCGCACCTTTATTAAGCCAGCACCTGGCTGAATCATTTTGACGCAGACAGCCTGCGTTACTACTACAC TCGGAAACTCTTTCGCGCATTGATGATATCGATCTCAACCTGGAAGATTTTCGTTACGCGTGTGAATGCCGATATCGTTAACAAAGTGGTTAA CCTGGCCTCCCGTAATGCGGGCTTTATCAACAAGCGTTTTGACGGCGTGTGGCAAGCGAACTGGCTGACCCGAGTTGTACAAAACCTTAC TGATGCCGCTGAAGTATTGGTGAAGCGTGGGAAAGCCGTGAATTTGGTAAAGCCGTGCGCGAAATCATGGCGCTGGCTGATCTGGCTAAC CGTATGTCGATGAACAGGCTCCGTGGTGGTGGCGAAACAGGAAGGCCGATGCCGACCTGCAGGCAATTTGCTCAATGGGCATCAACC TGTCCGCGTGTGATGACTTACCTGAAGCCGGTACTGCCGAAACTGACCGAGCGTGCAGAAGCATTCTCAATACGGAAGTCACTGGGAT GGTATCCAGCAACCGCTGCTGGGCCACAAAGTGAATCCGTTCAAGGCGCTGTATAACCGCATCGATATGAGGCAGGTTGAAGCACTGGTGG AAGCCTCTAAATGAGAAGTAAAAGCCGCTGCCGCGCCGGTAATGCCCCGCTGGCAGATGATCCGATTACAGGAAACCATCACCTTTGACGAC TTCGCTAAAGTTGACCTGCGCGTGGCGCTGATTGAAAACGCAGAGTTTGTGAAGGTTCTGACAACTGCTGCGCCTGACGCTGGATCTCGG CGGTGAAAACGCAATGTCTTCCGGTATTCGTTCTGCTTACCCGGATCCGCAGGCACTGATTGGTCGTCACACCATTATGGTGGCTAACCT GGCACCACGTAATAAGCGCTTCGGTATCTCTGAAGGCATGGTATGGCTGCCGCTCTGGCGGAAAGATATTTCTGCTAAGCCCGGATG CCGGTGCTAAACCGGGTCATCAGGTGAAATAATCCCCCTTCAAGGCGCTGCATCGACAGCCTTTTGCTTTATAAATCCTAAAGTTGTTTTCTT GCGATTTTGTCTCTCTAACCCGCATAAATACTGGTAGCATCTGCATTCAACTGGATAAAAATTACAGGGATGCAGAATGAGACTTTTATCTA TCAGGACGAAAAATCACATAAATTCAGGGCAGTTGAGCAACAGGGAAACGAGTTGCATATCAGTTGGGGAAAAGTTGGCACCAAAGGCAAA GCCAGATAAAAAGTTTTTTCAGATGCTGCGGCAGCGGCAAAGCGGAGCCCGACCTCGAGGGGGGGCCCGGTACCCGGCCGGACGTCTCTAG AGCTAGC

**Figure S4.**

**Alkyne functionalized fluorescent dyes for visualization of AnI labeled proteins.** Alkyne functionalized tetramethylrhodamine (TAMRA) or Alexa Fluor 488 dyes are appended to AnI residues by copper catalyzed click reaction.

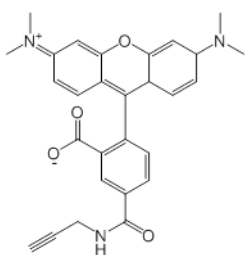

Alkyne-TAMRA

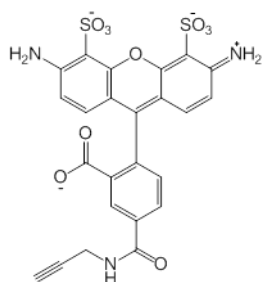

Alkyne-AlexaFluor 488

**Figure S5.**

**HeLa cell morphology after labeling and infection by various *Y. enterocolitica* strains.** HeLa cells were incubated with *Y. enterocolitica* at multiplicity of infection of 100 in the presence of 1 mM Met or 1 mM Anl. Infections with secretion wild type *Yersinia* resulted in a rounded morphology, whereas infections with secretion mutant *Yersinia* did not change HeLa cell morphology. Magnified versions are shown in the insets to the right of each image.

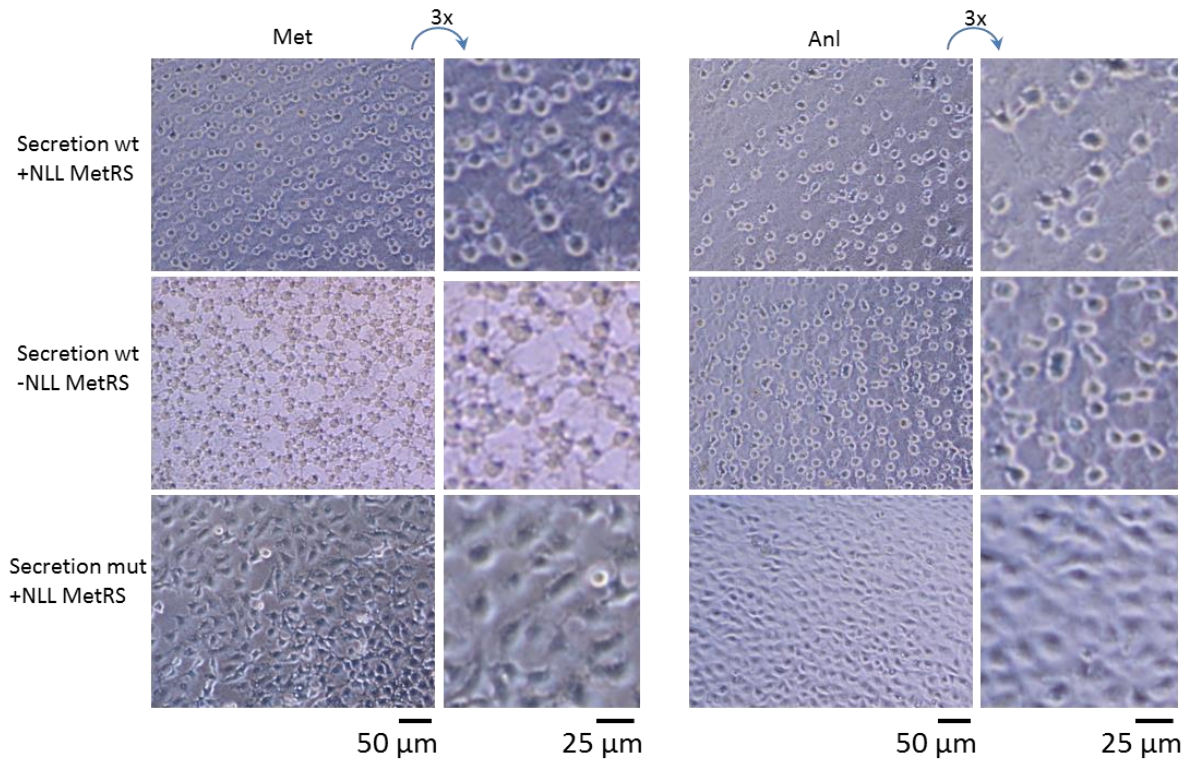

**Figure S6.**

**Identifying infection conditions to increase efficiency of Yop injection into HeLa cells.** Optimal conditions for AnI labeling of injected Yops were identified by investigating AnI concentrations of 0.5, 1 and 2 mM, as well as the timing of T3SS activation. **A.** AnI incorporation was detected by labeling with TAMRA alkyne dye and in-gel fluorescence detection. Activation of T3SS machinery was induced by pre-incubation of *Yersinia* at 37 °C for various times (0-60 min) before the start of infection. The labeling control (HeLa only) did not include any *Yersinia* cells. A pre-incubation step at 37 °C for 120 min was included to determine if longer pre-incubation would result in more labeling of injected proteins. Higher AnI concentrations consistently yielded higher levels of labeling with TAMRA dye, and longer pre-incubation at 37 °C resulted in more efficient injection. Secretion of Yops under LCR conditions (M) is included as a basis of comparison for the expected position of Yops **B.** Colloidal blue staining of the same gels shows equal protein loading across different conditions. Pre-incubation of *Yersinia* at 37 °C increases the efficiency of injection of labeled T3SS substrates. **C.** T3SS secretion competent *Y. enterocolitica* were pre-incubated at 37 °C for 1-5 hours before start of infection of HeLa cells. Infections were carried out in media containing 0.5, 1, 2 or 4 mM AnI. **D.** Colloidal blue dye staining of the same samples shows equal loading of HeLa lysates. H: HeLa lysates after infection with secretion WT *Yersinia*. M: Media secreted Yops under LCR conditions. Positions corresponding to different Yops are indicated to the right of the image.

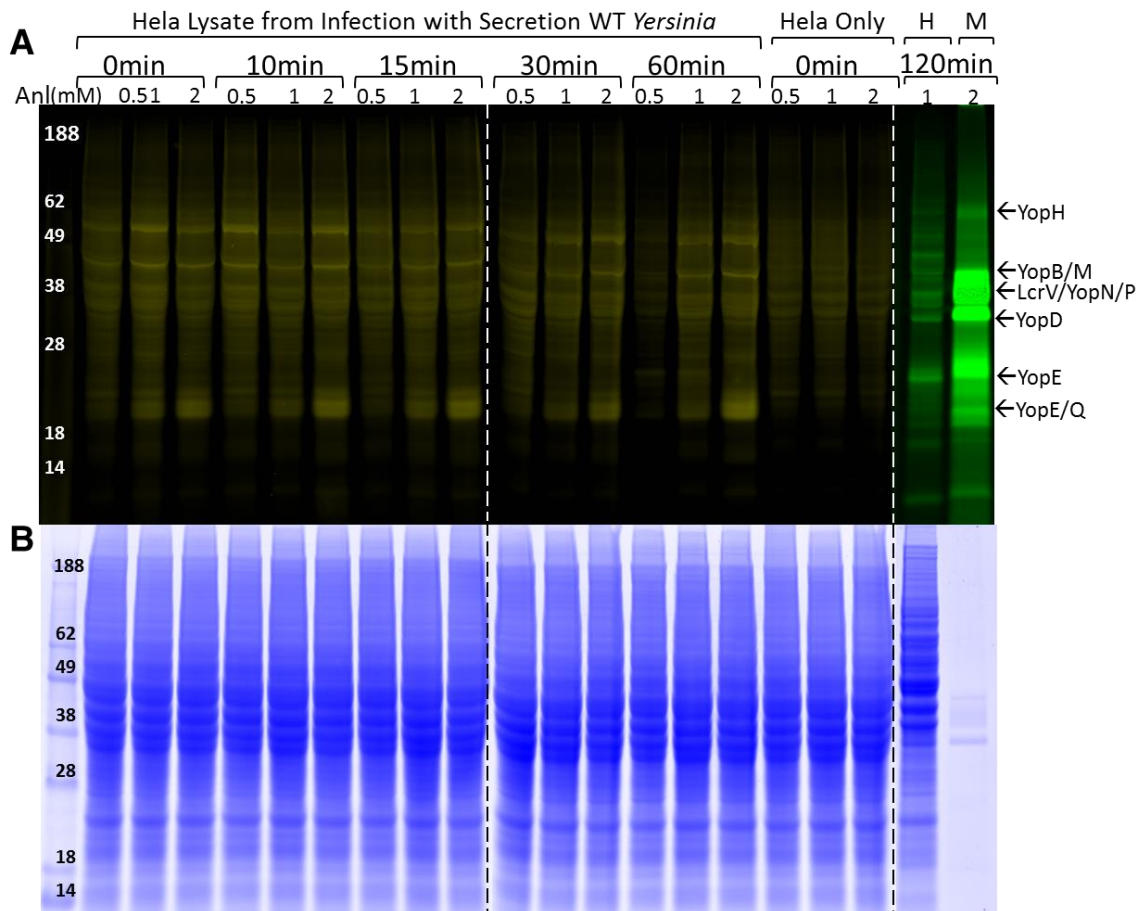



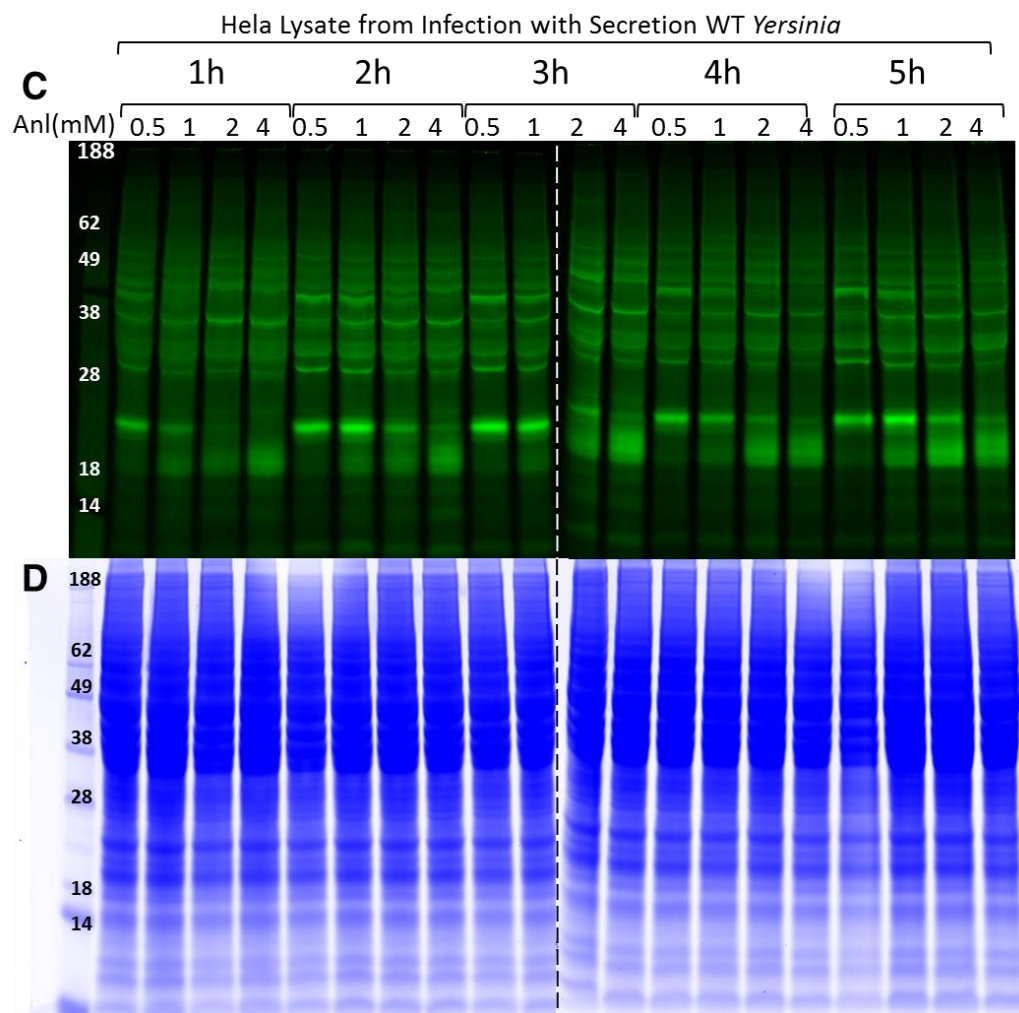

**Figure S7.**

**Selective lysis of HeLa cells in the presence of intact *Y. enterocolitica*.** Digitonin was used as a detergent to disrupt the HeLa cell membrane but not the bacterial envelope. Co-cultures of HeLa and *Yersinia* cells were lysed with various concentrations of digitonin in PBS. Briefly, 6-well plates containing  $1.5 \times 10^6$  HeLa cells and *Yersinia* at MOI of 100 were lysed for 20 min at room temperature. After lysis of HeLa cells, *Yersinia* cells were removed by centrifugation at 15000 rcf and the remaining supernatant proteins were precipitated with chloroform/methanol. The proteins were resuspended in 1% SDS and electrophoresed on a 12% polyacrylamide gel and stained with colloidal blue. Efficient lysis of HeLa cells was observed with digitonin concentrations as low as 0.025% v/w. In the absence of HeLa cells and presence of *Yersinia*, no protein could be observed after incubation with digitonin, indicating lack of *Yersinia* lysis. Western blot analysis with antibody specific for *Yersinia* RpoA confirmed the lack of bacterial lysis. A small amount of non-specific binding was observed with this antibody under all conditions, including those with no bacteria. *Yersinia* lysis with 2% SDS served as a positive control for RpoA labeling. Western blot analysis with an antibody specific to  $\alpha$ -tubulin was used as a loading control to show the extent of HeLa cell lysis. Western blots probed with  $\alpha$ -tubulin antibody confirmed that 0.05% digitonin is sufficient for HeLa cell lysis. Digitonin concentrations are given as weight per volume of PBS.

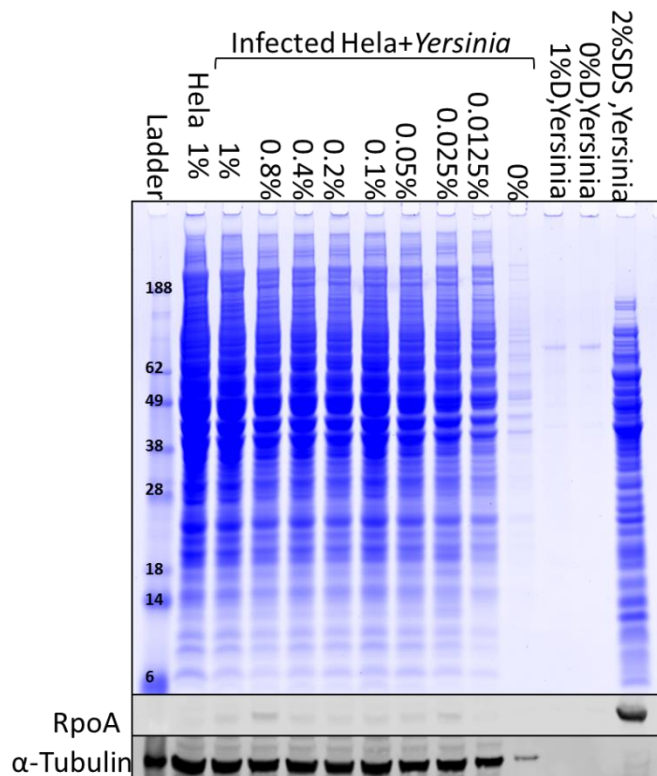

**Figure S8.**

**Control conditions for detection of labeled proteins in absence of AnI incorporation.** The images in this section are labeling controls for the infection studies shown in Fig. 3D, E of the main text. The images were obtained from infections in 1 mM AnI with secretion wild type *Y. enterocolitica* lacking the NLL-MetRS. AnI residues were labeled with alkyne-functionalized AlexaFluor 488; the resulting fluorescence is shown in green. AlexaFluor 633 conjugated to wheat germ agglutinin (WGA) labels membranes of HeLa cells; the corresponding fluorescence is shown in red. In the absence of NLL-MetRS, AnI is not incorporated into *Yersinia* proteins; therefore there is no labeling with alkyne-functionalized AlexaFluor 488.

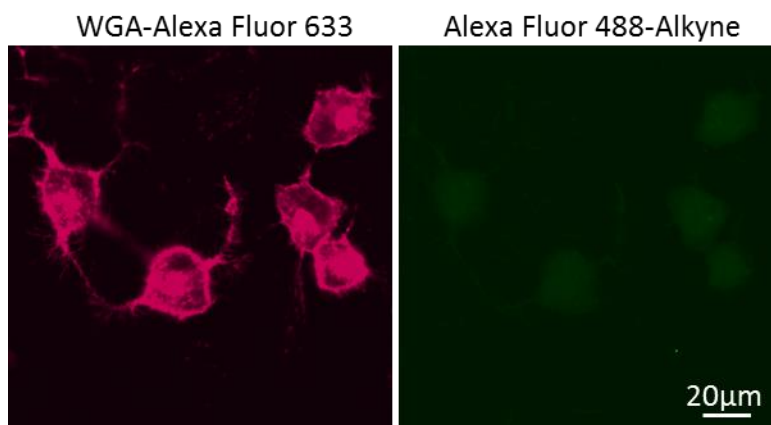

The wild-type MetRS does not activate AnI to any appreciable extent; however the NLL-MetRS does activate Met. We have previously measured the kinetics of amino acid activation by NLL-MetRS;  $k_{\text{cat}}/K_m$  is  $350 \pm 70 \text{ M}^{-1}\text{s}^{-1}$  for Met and  $410 \pm 80 \text{ M}^{-1}\text{s}^{-1}$  for AnI. See Ref. 6 of the main text for measurement of the catalytic efficiency of MetRS variants. As shown in Figure 3A lane 5 of the main text, labeling in absence of NLL-MetRS is negligible. This is also evident in the images above as bacteria lacking the NLL-MetRS are not labeled, even in the presence of AnI. The Optimum medium contains about 100  $\mu\text{M}$  Met; infections were performed in 1 mM AnI,

**Figure S9.**

**Directed mass spectrometry search for gel-extracted peptides derived from Yops secreted under LCR conditions.** A directed mass spectrometric search was used to determine the Met positions occupied by AnI in each Yop. Yops were secreted under LCR conditions in the presence of 1 mM AnI in 19-amino acid M9 medium supplemented with 25  $\mu$ M Met and lacking calcium chloride. Secreted proteins were precipitated by chloroform/methanol treatment, resuspended in 1% SDS in PBS, electrophoresed on a 12% bis-tris acrylamide gel and stained with colloidal blue. The resulting bands were cut out, and in-gel tryptic digestion was performed for each gel fragment. To help identify peptides corresponding to each Yop, an m/z inclusion list for expected peptide ions was generated taking into account up to two missed cleavages by trypsin as well as fixed carbamidomethyl modification of cysteine and variable oxidation of Met. Replacement of Met by AnI was included as a variable modification. This inclusion list was used to perform directed LC-MS/MS experiments on an LTQ-FT Ultra mass spectrometer (Thermo Fisher Scientific) equipped with a nanoelectrospray ion source (Thermo Fisher Scientific) connected to an EASY-nLC II (Thermo Fisher Scientific).

A. Image of the cut out gel fragments with the total number of identified spectra shown for each fragment. The corresponding Yop positions are indicated next to the image. B. The total number of Met positions based on the protein sequence for each Yop and the molecular weight is listed. C. The number of identified spectra for each Yop is shown for each extracted gel section, the order of the gel slices correspond to decreasing molecular weight of protein.

a.

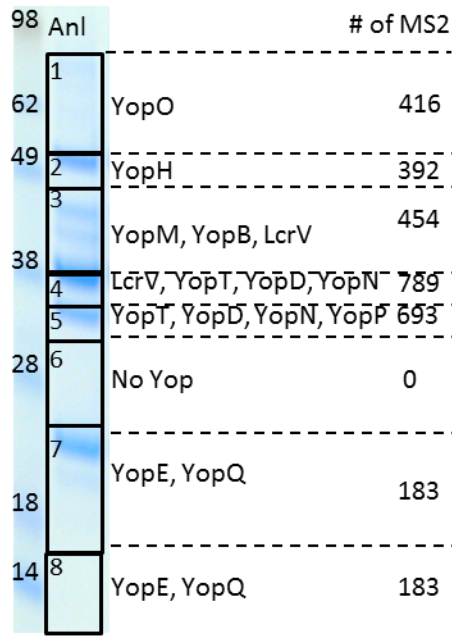

b.

| Name of protein | MW    | # Met |
|-----------------|-------|-------|
| YopO            | 81280 | 18    |
| YopH            | 50940 | 13    |
| YopB            | 41916 | 15    |
| YopM            | 41339 | 4     |
| LcrV            | 37296 | 7     |
| YopT            | 36082 | 8     |
| YopD            | 33232 | 13    |
| YopN            | 32925 | 5     |
| YopP            | 32418 | 8     |
| YopE            | 23016 | 9     |
| YopQ            | 20829 | 4     |

c.

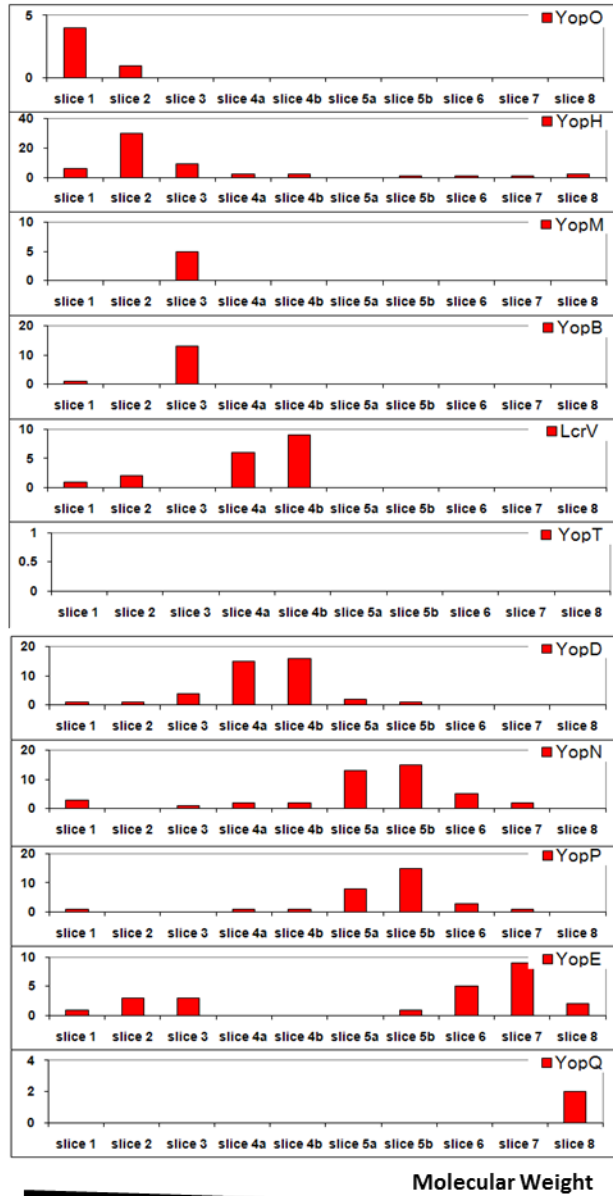

**Figure S10.**

**Detection of residue-specific incorporation of AnI in Yops.** Directed mass spectrometry was performed based on an expected peptide ion list (see Fig. S9 for details) from gel-extracted Yops from proteins secreted under LCR conditions. An example of this analysis for YopH is illustrated here showing the sequence coverage obtained in presence or absence of AnI labeling.

**A.** Highlighted sequences depict coverage by LC-MS/MS; modified Met residues are highlighted in green indicating oxidation of methionine in the “+Methionine” condition and incorporation of AnI in the “+Azidonorleucine” condition. Small differences were observed between the sequence coverages obtained for Met- and AnI-treated samples. **B.** The Met positions at which AnI was observed are shown for YopH as a function of residue position along the sequence. Black boxes are positions at which AnI was observed, and the frequencies at which Met and AnI were observed are shown for each position. **C.** A representative spectrum from an LC-MS/MS analysis on a precursor ion of the  $M^{+23}TQQVGLGDGIM^{+16(ox)}ADM^{+23}YTLTIR$  peptide is shown, with y-ions shown in blue and b-ions shown in red. A mass increment of 16 amu indicates that the Met at position 328 is oxidized. AnI is incorporated at positions 307 and 331, as indicated by mass shifts of 23 amu each. This mass shift corresponds to replacement of Met by AnI (Fig S2). A similar analysis was performed for each Yop.

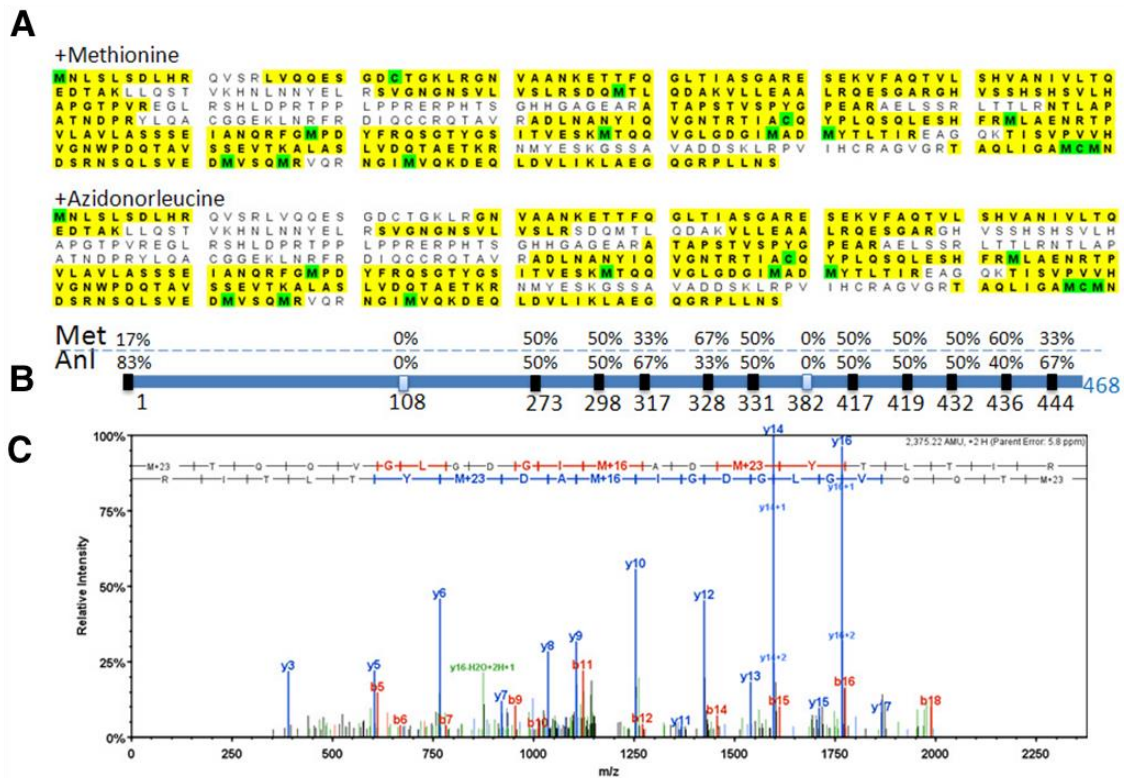

**Figure S11.**

**Identifying the pattern of residue-specific replacement of methionine by azidonorleucine in Yops as a function of protein molecular weight and number of methionines.** Directed mass spectrometry was used to determine the total number of Met positions at which AnI incorporation was observed. *A.* The number of Met positions as a function of molecular weight for each Yop is plotted to show the number of methionines contained in sequence of each Yop. *B.* The experimentally observed number of AnI residues (replacement of methionine) for each Yop as identified by MS. *C.* The sequence coverage observed by MS for each Yop. Sequence coverage is represented in yellow, and the position of each Met is represented as a circle. Black circles represent detection of AnI at a given Met position. These results were obtained from secretion of Yops under LCR conditions. The extent of labeling and observed sequence coverage may differ from those of Yops injected in HeLa cell infection.

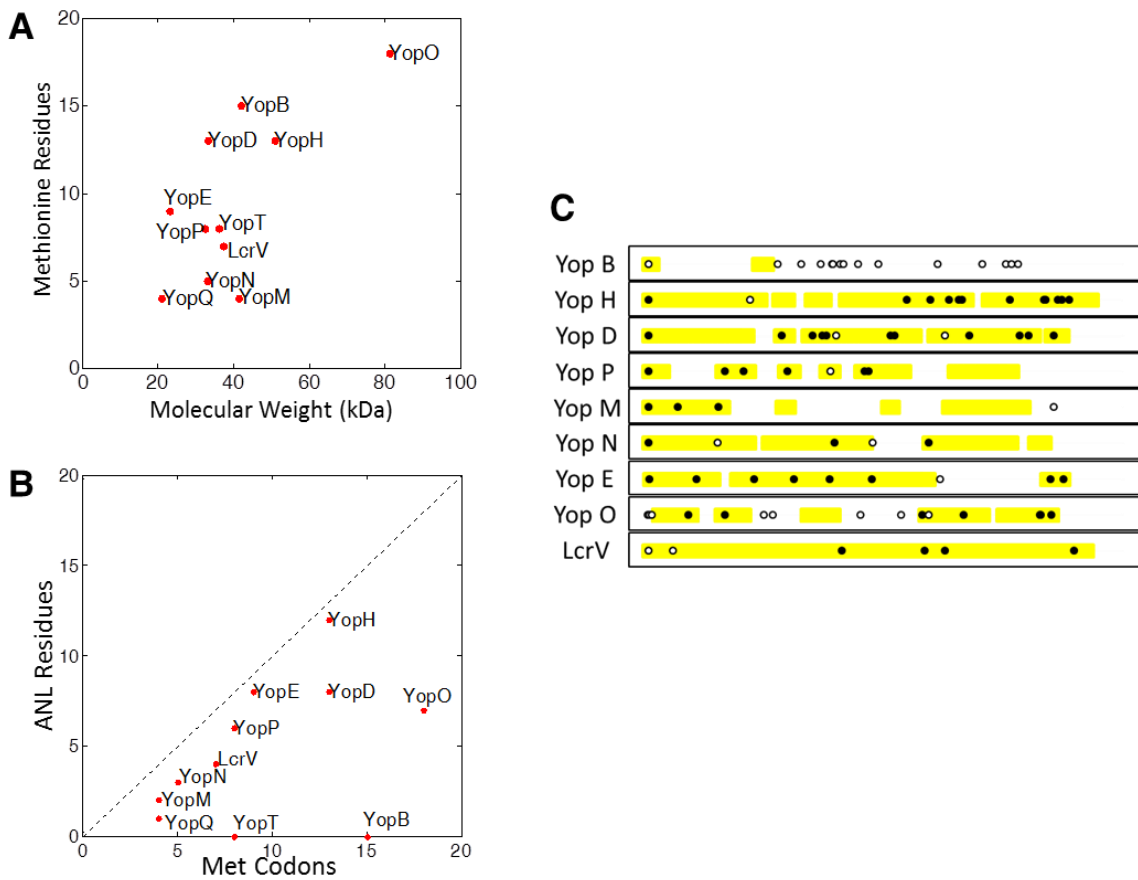

**Figure S12.**

**Detection of biotin after click reaction of alkyne-biotin probe to proteins containing AnI.** HeLa infections and secretion of Yops under LCR conditions were performed as described in the methods section of the main text. Proteins were treated with the biotin-alkyne affinity tag (structure **4** in the main text) and biotinylation was detected by western blot with a streptavidin Alexa fluor-633 conjugate antibody. Image below shows biotin labeling in injected HeLa cell lysates as well as proteins secreted under LCR conditions. Biotinylated horseradish peroxidase (HRP) was used as positive control for labeling.

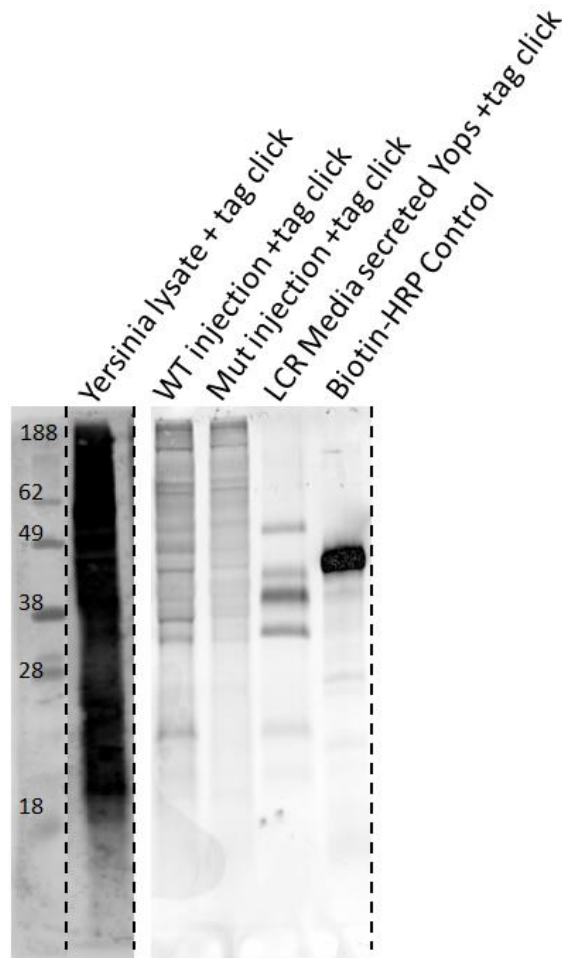



**Figure S13.**

**Affinity enrichment of injected *Y. enterocolitica* proteins from infected HeLa cell lysates.** *A.* Infected HeLa cell lysates were treated with probe **4** and affinity purified on a streptavidin column. Flow-through (FT) and elution (EL) fractions were stained with colloidal blue. *B.* Western blot detection of YopE and mammalian  $\alpha$ -tubulin in the same fractions as those represented in *A*. YopE was enriched from HeLa infections with T3SS-Wt *Yersinia*. Lack of  $\alpha$ -tubulin in the elution fractions confirmed efficient removal of HeLa cell proteins.

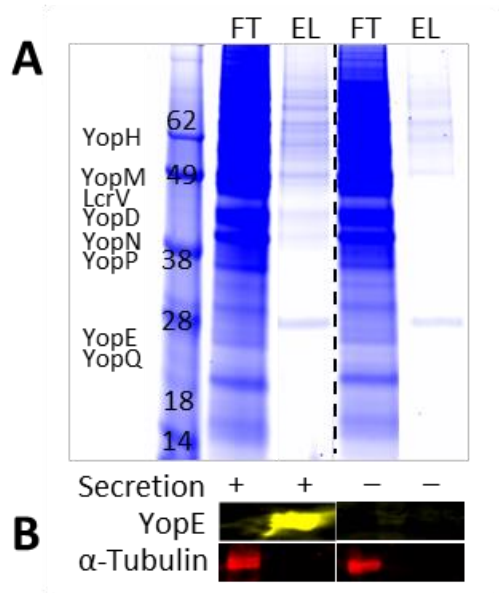

**Figure S14.**

**Comparison of MS/MS spectra from Yops secreted under LCR conditions and Yops injected into HeLa cells.** *A.* Tandem mass spectrum corresponding to a peptide from YopD from proteins secreted under LCR conditions. *B.* Tandem mass spectrum identified from infected HeLa cell lysates and corresponding to the same peptide sequence as in *A.* Both samples were gel extracted and desalted on C18 ziptip columns. A doubly charged  $m/z$  701.86 amu peptide ion corresponding to the sequence "EKEVNASIAANEK" gave a precursor mass of 1401.71 (theoretical value 1401.7172). The  $y$ - and  $b$ -ions are color coded blue and red, respectively, along with the matching peptide sequence on top of each spectrum. Spectra were obtained on a nanoLC-Thermo Fisher Scientific LTQ-FT spectrometer with the peptide mass range set to 200-1700 amu.

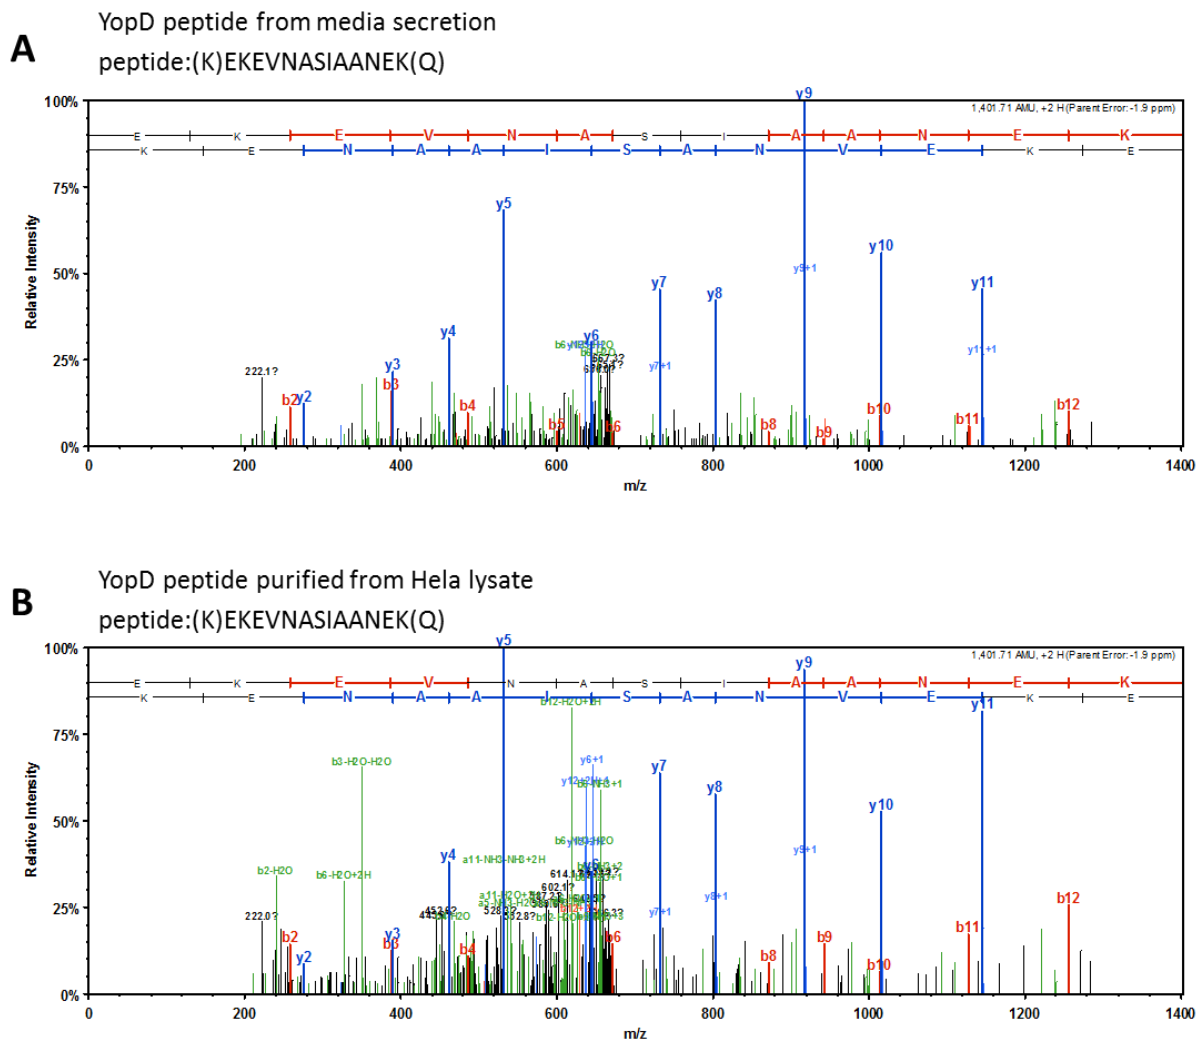

Figure S15.

Representative MS/MS spectra from Yops peptides identified after enrichment of inected proteins from HeLa cell lysates. The sequence of the peptide is shown on top of each spectrum. The  $\gamma$ - and  $b$ -ions are color coded blue and red, respectively, along with the matching peptide sequence. A mass modification of  $M+121$  amu at each Met position indicates the mass addition resulting from attachment and cleavage of the biotin-alkyne tag.

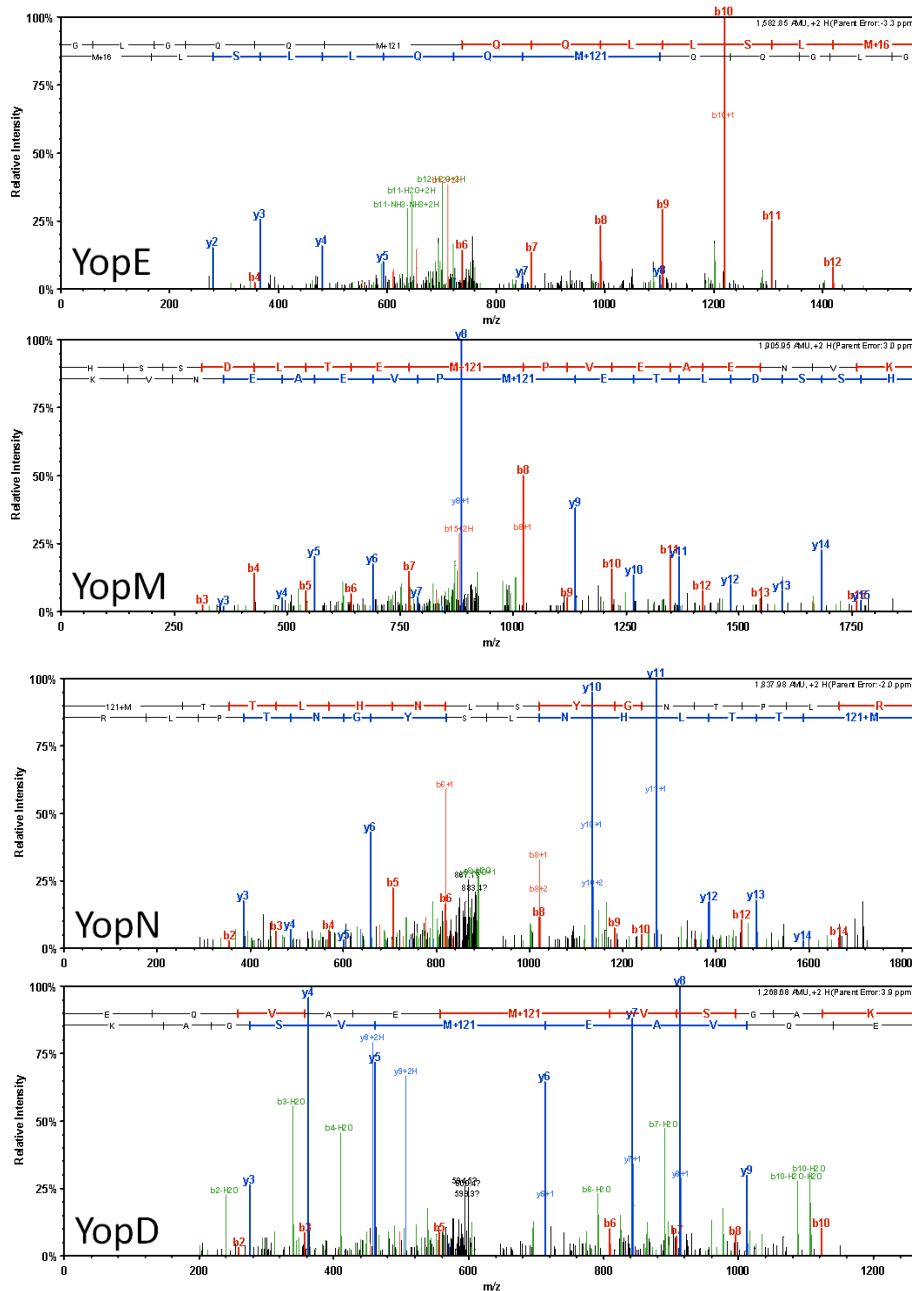

**Figure S16.**

**Identification of secreted *Yersinia* proteins during infection.** Infection medium was removed after the completion of HeLa infections, and proteins were precipitated with chloroform-methanol. AnI labeled proteins were tagged with probe **4**, enriched on a streptavidin column and analyzed by LC-MS. The secreted proteins identified here correspond to infections in Fig. 3F of main text. Three independent replicates were performed. The color-code next to the protein names indicates the number of identifications of each protein across experimental replicates. Venn diagram shows proteins detected in infections with T3SS-Wt *Yersinia* or the T3SS-Mut strain.

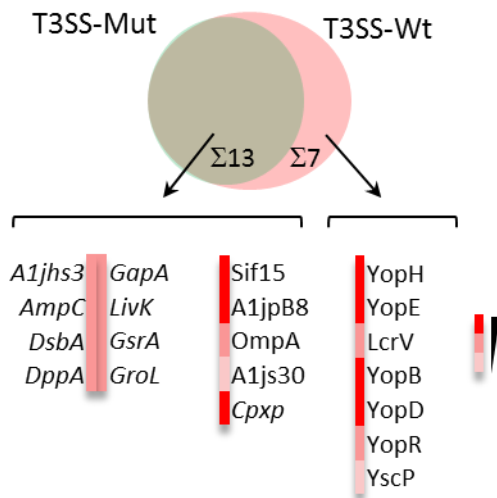

**Figure S17.**

**AnI labeling of intracellular and extracellular bacteria in the absence of gentamicin.** Infections corresponding to Fig. 4A of the main text were carried out using identical conditions; infections were carried out in the absence of gentamicin. Extracellular bacteria incorporated AnI into newly synthesized proteins and can be readily observed outside HeLa cells. In the image below, confocal fluorescence microscopy shows labeling of AnI residues with alkyne-AlexaFluor 488 (green). HeLa cell membranes were labeled with AlexaFluor633-WGA conjugate (red).

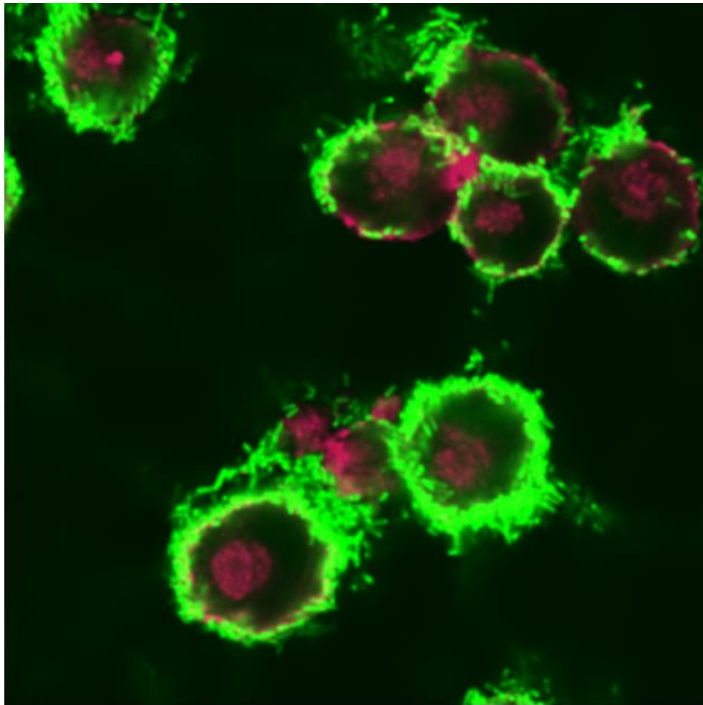

- Gentamicin

10 $\mu$ m

**Figure S18.**

**Fluorescence confocal microscopy shows internalized *Yersinia* inside infected HeLa cells.** Confocal planes from top to bottom of HeLa cell samples are numbered 1-12. AlexaFluor 633 conjugated to WGA was used to label the membranes of HeLa cells; the associated fluorescence is shown in red. AnI-labeled proteins were treated with alkyne-functionalized AlexaFluor 488; the associated fluorescence is shown in green. A. Gentamicin was added in this experiment to kill extracellular bacteria before AnI incorporation. Internalized *Yersinia* can be observed inside infected HeLa cells. See intracellular labeling video S1.

**A**

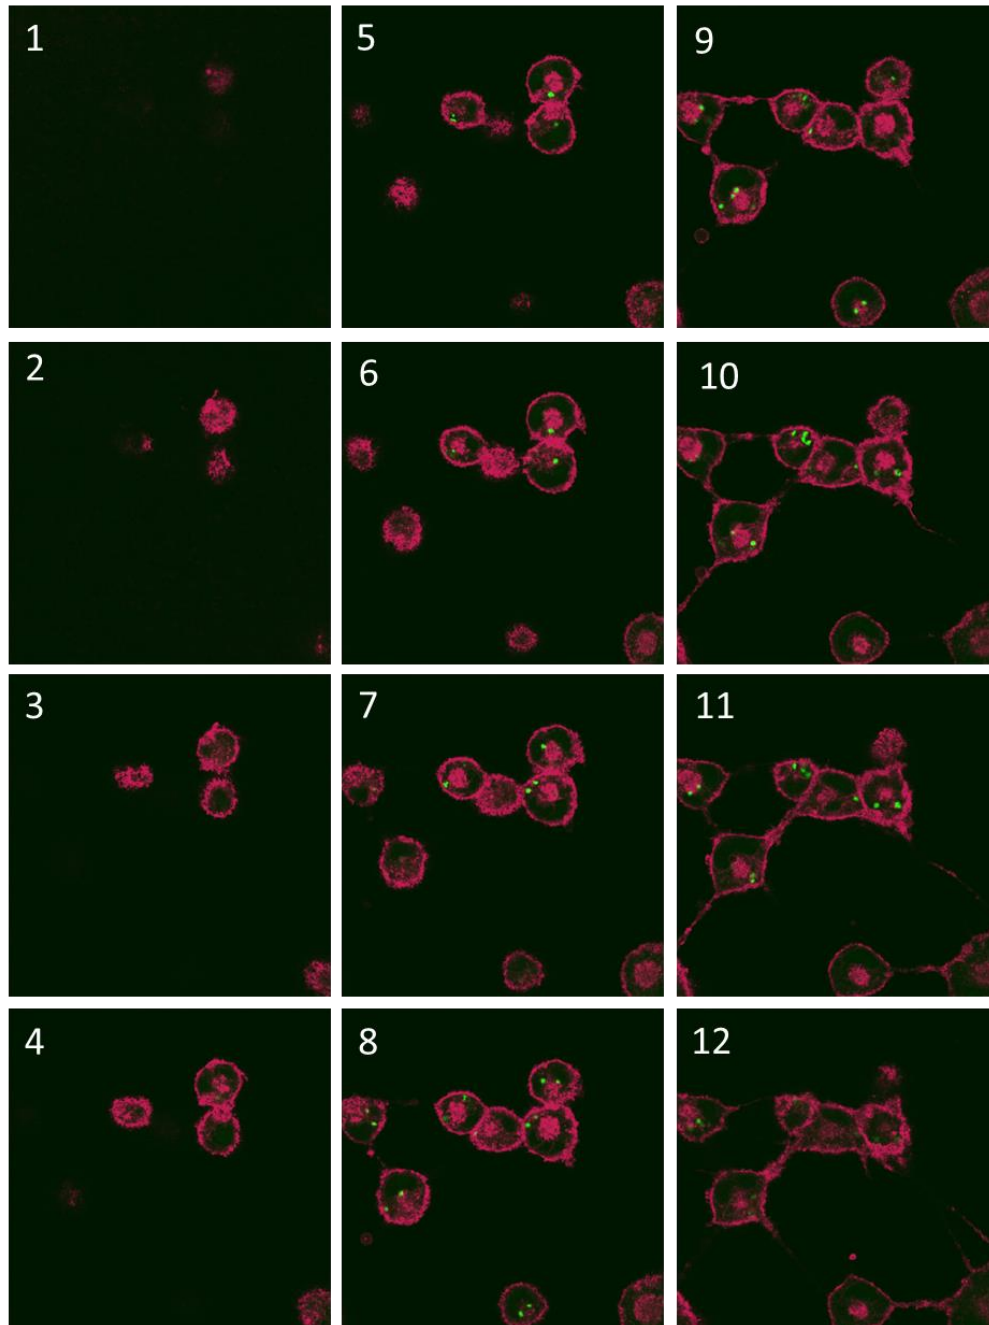

B. Gentamicin was not added in this experiment, and labeling was performed as described above. Both extracellular and intracellular bacteria have incorporated AnI into newly synthesized proteins and are labeled with alkyne-functionalized AlexaFluor 488 (green). See intracellular and extracellular labeling video S2.

B

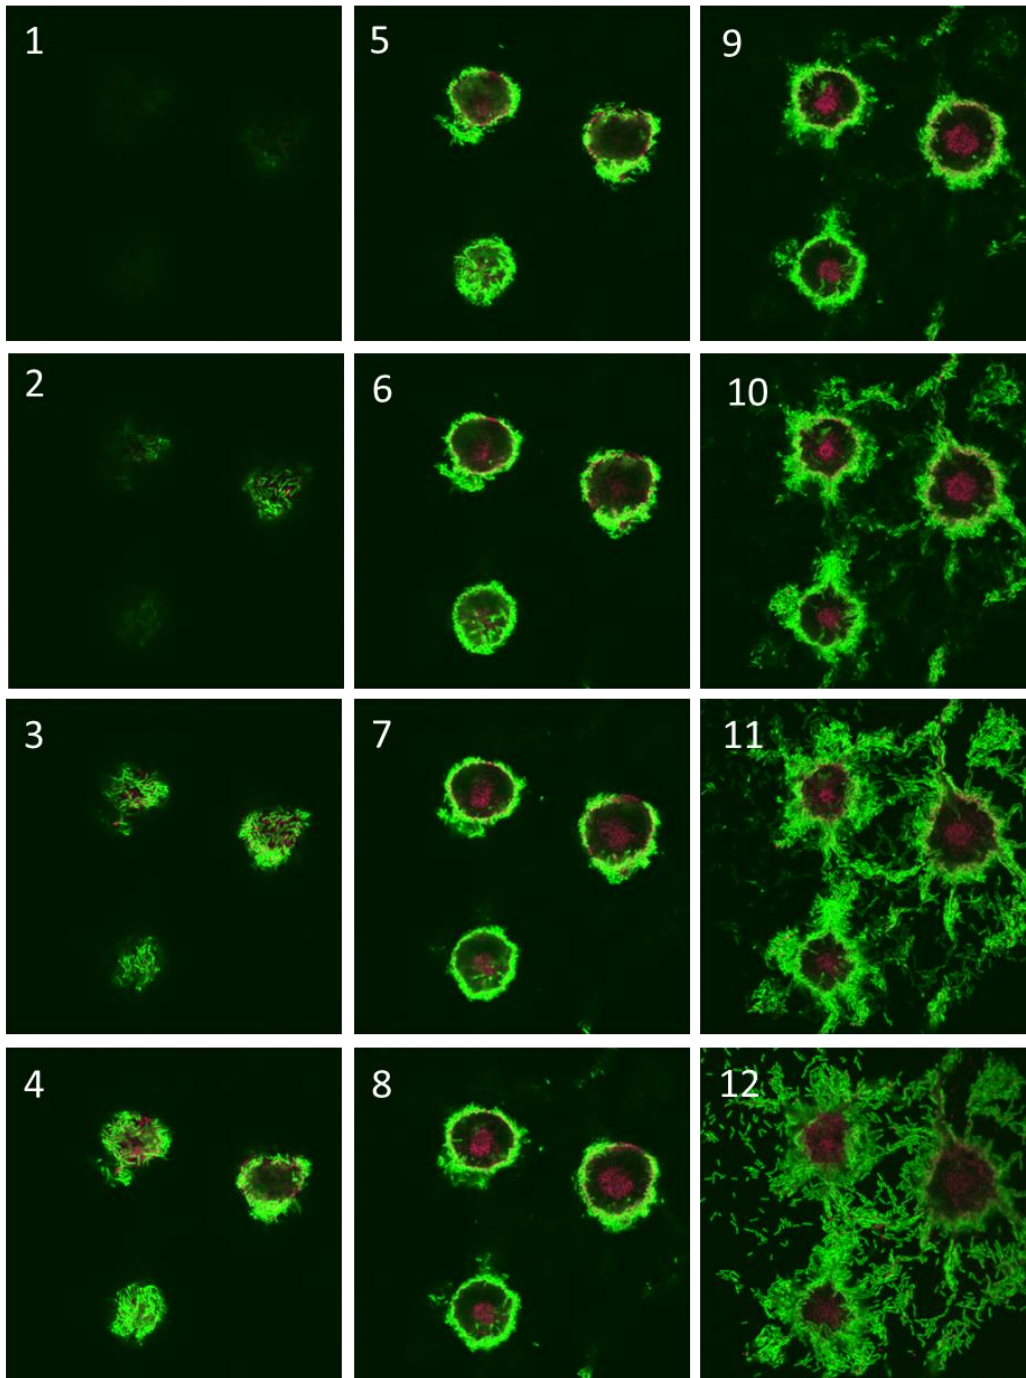

**Figure S19.**

**Comparison of injected proteins in HeLa cells in presence or absence of gentamicin.** Lysates of HeLa cells from infections corresponding to Fig 4B of the main text were analyzed by shotgun MS. Both infection mixtures were labeled with AnI for the same duration under identical conditions (except for the presence or absence of gentamicin). AnI labeled proteins were enriched using probe 4 before MS identification. Venn diagram shows the T3SS substrates identified under the two conditions, showing that intracellular *Yersinia* (+gent) injected a subset of Yops.

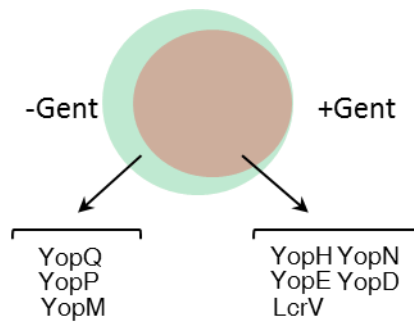



## Table S1.

**Proteins identified in infections with secretion wild type and secretion mutant *Y. enterocolitica*.** Peptides were fractionated on a 15 cm reversed phase analytical column (75  $\mu$ m ID) in-house packed with 3  $\mu$ m C18 beads (ReproSil-Pur C18-AQ medium; Dr. Maisch GmbH) with a 60-minute gradient from 5% to 28% acetonitrile in 0.2% formic acid, over 50 minutes, followed by 10 minutes at 80 % acetonitrile in 0.2% formic acid, at a flow rate of 350 nl per minute.

The mass spectrometers were operated in data-dependent mode automatically switching between full-scan MS and tandem MS acquisition. Survey full scan mass spectra were acquired after accumulation of 500,000 ions, with a resolution of 60,000 (Orbitrap) and 50,000 (LTQ-FT) at 400 m/z. The top ten most intense ions from the survey scan were isolated and, after the accumulation of 5000 ions, fragmented in the linear ion trap by collision induced dissociation. Preview scan mode was enabled in the Orbitrap but not in the LTQ-FT. Precursor ion charge state screening was enabled and singly charged and unassigned charge states were rejected. The dynamic exclusion list was enabled with a relative mass window of 10 ppm and early expiration turned on.

T3SS substrates in HeLa infections were identified by a bottom up shotgun approach. MGF files were generated from Thermo RAW files using ReAdW4Mascot2 (v. 20090305a). The MGF files were searched using Mascot software (Matrix science, v2.2.06). The files were searched against the *Y. enterocolitica* proteome (5109 sequences, Uniprot) and a set of common contaminants (262 sequences). A decoy database consisting of the target protein sequences reversed was constructed to estimate the false discovery rate. The database search included mass modifications associated with AnI tagging (outlined in Fig. S2), as well as fixed carbamidomethyl modification of cysteine (+57.0214), variable oxidation of methionine (+15.9949) and N-terminal acetylation. A precursor tolerance of 10 ppm and fragment tolerance of 0.5 Da were used. Trypsin was the specified digestion enzyme and up to two missed cleavages were allowed. Scaffold software (Proteome software v3) was used to generate the list of identified proteins, using 99.9% protein probability, minimum of 2 peptides per protein and 95% peptide probability (Table S1) as thresholds for acceptance. Each identified protein was present in at least three independent infections. MS analysis was performed on a nanoLC LTQ-FT mass spectrometer. MS data were analyzed by Mascot and Scaffold software packages.

All identified proteins had a false discovery rate of less than 1%. The criterion for inclusion of a protein found in the HeLa cell lysate was that it was observed in at least three different samples (of a total of six infections). The number of times a proteins was present was counted independently for secretion WT and secretion Mut infections; the larger of the two numbers is reported by the color code. For proteins secreted into the medium, the protein had to be present in two different samples (in a total of three infections) to be included in the Venn diagram. If a protein was observed in both the secretion WT and Mut infections in any of these samples, it was considered to be present in the joint distribution. YopQ was observed once in the secretion WT infection in HeLa cells and YscP was observed once in the secreted fraction isolated from infection with secretion WT *Yersinia*. YopE was observed once in the HeLa fraction of infections with secretion Mut *Yersinia*, but because it was present in every sample of injected proteins with secretion WT *Yersinia* it was retained in the secretion WT fraction in Fig.

3F. A1js30 was observed in three independent HeLa injections as reported in Fig. 3F. A1js30 was observed in only one of the samples of secreted proteins; although it did not meet the standard for inclusion in the secreted proteins, we included it to show that this protein may be present in the infection medium. Experiments are listed in reverse chronological order in the table below. Proteins identified in each experiment are sorted from highest to lowest based on the number of identified peptides and listed as such in the table. For time-series measurements using pulse-AnI labeling, three replicates were performed for early and intermediate time-points of 60 and 120 minutes respectively and identification was based on at least one observation of T3SS substrates across the samples. For the 210 minute sample we used the same list of proteins as that identified for Fig. 3F of the paper because these experiments used identical AnI labeling windows and infections. Variations in the numbers of identified proteins were observed as we improved our enrichment methods and instrument settings. Final enrichment methods and instrument settings are reported in the methods section.

| Secretion Wt Injected Proteins 1                                                                                                | Accession Number |
|---------------------------------------------------------------------------------------------------------------------------------|------------------|
| Yop effector YopE OS=Yersinia enterocolitica GN=yopE PE=4 SV=1                                                                  | Q7BRY7_YEREN     |
| Yop effector YopH OS=Yersinia enterocolitica GN=yopH PE=4 SV=1                                                                  | Q7BRY8_YEREN     |
| 60 kDa chaperonin OS=Yersinia enterocolitica serotype O:8 / biotype 1B (strain 8081) GN=groL PE=3 SV=1                          | CH60_YERE8       |
| YopN OS=Yersinia enterocolitica GN=yopN PE=4 SV=1                                                                               | O68333_YEREN     |
| Elongation factor Tu A (Fragment) OS=Yersinia enterocolitica GN=tufA PE=4 SV=1                                                  | B6RBB1_YEREN     |
| Yop effector YopP OS=Yersinia enterocolitica GN=yopP PE=4 SV=1                                                                  | O52162_YEREN     |
| Chaperone protein htpG OS=Yersinia enterocolitica serotype O:8 / biotype 1B (strain 8081) GN=htpG PE=3 SV=1                     | HTPG_YERE8       |
| Chaperone protein dnaK OS=Yersinia enterocolitica serotype O:8 / biotype 1B (strain 8081) GN=dnaK PE=2 SV=1                     | DNAK_YERE8       |
| Enolase OS=Yersinia enterocolitica serotype O:8 / biotype 1B (strain 8081) GN=eno PE=3 SV=1                                     | ENO_YERE8        |
| Attachment invasion locus protein OS=Yersinia enterocolitica GN=ail PE=4 SV=1                                                   | D7PM19_YEREN     |
| Yop effector YopM OS=Yersinia enterocolitica GN=yopM PE=4 SV=1                                                                  | P74988_YEREN     |
| Elongation factor G OS=Yersinia enterocolitica serotype O:8 / biotype 1B (strain 8081) GN=fusA PE=3 SV=1                        | A1J554_YERE8     |
| Elongation factor Ts OS=Yersinia enterocolitica serotype O:8 / biotype 1B (strain 8081) GN=tsf PE=3 SV=1                        | EFTS_YERE8       |
| Putative exported protein OS=Yersinia enterocolitica serotype O:8 / biotype 1B (strain 8081) GN=YE3039 PE=3 SV=1                | A1JP43_YERE8     |
| Elongation factor Tu 1 OS=Yersinia enterocolitica serotype O:8 / biotype 1B (strain 8081) GN=tuf1 PE=3 SV=1                     | EFTU1_YERE8      |
| 50S ribosomal protein L1 OS=Yersinia enterocolitica serotype O:8 / biotype 1B (strain 8081) GN=rplA PE=3 SV=1                   | RL1_YERE8        |
| Glyceraldehyde 3-phosphate dehydrogenase A OS=Yersinia enterocolitica serotype O:8 / biotype 1B (strain 8081) GN=gapA PE=3 SV=1 | A1JQH1_YERE8     |
| Peptidoglycan-associated lipoprotein Pal OS=Yersinia enterocolitica serotype O:8 / biotype 1B (strain 8081) GN=pal PE=3 SV=1    | A1JRK6_YERE8     |
| Virulence-associated V antigen OS=Yersinia enterocolitica serotype O:8 / biotype 1B (strain 8081) GN=lcrV PE=4 SV=1             | A1JU73_YERE8     |
| Trigger factor OS=Yersinia enterocolitica serotype O:8 / biotype 1B (strain 8081) GN=tig PE=3 SV=1                              | TIG_YERE8        |
| Outer membrane porin protein OS=Yersinia enterocolitica serotype O:8 / biotype 1B (strain 8081) GN=YE2463 PE=4 SV=1             | A1JS30_YERE8     |
| Adhesin yadA OS=Yersinia enterocolitica GN=yadA PE=1 SV=1                                                                       | YADA1_YEREN      |
| Putative outer membrane porin A protein OS=Yersinia enterocolitica serotype O:8 / biotype 1B (strain 8081) GN=ompA PE=3 SV=1    | A1JMT3_YERE8     |
| Cell division protein ftsZ OS=Yersinia enterocolitica serotype O:8 / biotype 1B (strain 8081) GN=ftsZ PE=3 SV=1                 | A1JJJ8_YERE8     |
| Methionyl-tRNA synthetase OS=Yersinia enterocolitica serotype O:8 / biotype 1B (strain 8081) GN=metG PE=3 SV=1                  | SYM_YERE8        |
| Secretion Wt Injected Proteins 2                                                                                                | Accession Number |

|                                                                                                                                  |                  |
|----------------------------------------------------------------------------------------------------------------------------------|------------------|
| 60 kDa chaperonin OS=Yersinia enterocolitica serotype O:8 / biotype 1B (strain 8081) GN=groL PE=3 SV=1                           | CH60_YERE8       |
| Yop effector YopE OS=Yersinia enterocolitica GN=yopE PE=4 SV=1                                                                   | Q7BRY7_YEREN     |
| Translocator protein OS=Yersinia enterocolitica serotype O:8 / biotype 1B (strain 8081) GN=yopD PE=4 SV=1                        | A1JU70_YERE8     |
| Chaperone protein dnaK OS=Yersinia enterocolitica serotype O:8 / biotype 1B (strain 8081) GN=dnaK PE=2 SV=1                      | DNAK_YERE8       |
| Elongation factor Tu 1 OS=Yersinia enterocolitica serotype O:8 / biotype 1B (strain 8081) GN=tuf1 PE=3 SV=1                      | EFTU1_YERE8      |
| Yop effector YopH OS=Yersinia enterocolitica GN=yopH PE=4 SV=1                                                                   | Q7BRY8_YEREN     |
| Chaperone protein htpG OS=Yersinia enterocolitica serotype O:8 / biotype 1B (strain 8081) GN=htpG PE=3 SV=1                      | HTPG_YERE8       |
| Elongation factor G OS=Yersinia enterocolitica serotype O:8 / biotype 1B (strain 8081) GN=fusA PE=3 SV=1                         | A1JS54_YERE8     |
| Elongation factor Ts OS=Yersinia enterocolitica serotype O:8 / biotype 1B (strain 8081) GN=tsf PE=3 SV=1                         | EFTS_YERE8       |
| Putative exported protein OS=Yersinia enterocolitica serotype O:8 / biotype 1B (strain 8081) GN=YE3039 PE=3 SV=1                 | A1JP43_YERE8     |
| Enolase OS=Yersinia enterocolitica serotype O:8 / biotype 1B (strain 8081) GN=eno PE=3 SV=1                                      | ENO_YERE8        |
| Glyceraldehyde 3-phosphate dehydrogenase A OS=Yersinia enterocolitica serotype O:8 / biotype 1B (strain 8081) GN=gapA PE=3 SV=1  | A1JQH1_YERE8     |
| Clp ATPase OS=Yersinia enterocolitica serotype O:8 / biotype 1B (strain 8081) GN=clpB PE=3 SV=1                                  | A1JK85_YERE8     |
| Transaldolase OS=Yersinia enterocolitica serotype O:8 / biotype 1B (strain 8081) GN=tal PE=3 SV=1                                | TAL_YERE8        |
| Methionyl-tRNA synthetase OS=Yersinia enterocolitica serotype O:8 / biotype 1B (strain 8081) GN=metG PE=3 SV=1                   | SYM_YERE8        |
| Branched-chain amino acid-binding protein OS=Yersinia enterocolitica serotype O:8 / biotype 1B (strain 8081) GN=livK PE=3 SV=1   | A1JIC6_YERE8     |
| Ribosome-recycling factor OS=Yersinia enterocolitica serotype O:8 / biotype 1B (strain 8081) GN=frr PE=3 SV=1                    | RRF_YERE8        |
| Protein tolB OS=Yersinia enterocolitica serotype O:8 / biotype 1B (strain 8081) GN=tolB PE=3 SV=1                                | TOLB_YERE8       |
| Putative outer membrane porin A protein OS=Yersinia enterocolitica serotype O:8 / biotype 1B (strain 8081) GN=ompA PE=3 SV=1     | A1JMT3_YERE8     |
| 30S ribosomal protein S1 OS=Yersinia enterocolitica serotype O:8 / biotype 1B (strain 8081) GN=rpsA PE=4 SV=1                    | A1JMI7_YERE8     |
| ATP-dependent protease ATPase subunit HslU OS=Yersinia enterocolitica serotype O:8 / biotype 1B (strain 8081) GN=hslU PE=3 SV=1  | HSLU_YERE8       |
| Trigger factor OS=Yersinia enterocolitica serotype O:8 / biotype 1B (strain 8081) GN=tig PE=3 SV=1                               | TIG_YERE8        |
| Putative exported protein OS=Yersinia enterocolitica serotype O:8 / biotype 1B (strain 8081) GN=YE2166 PE=3 SV=1                 | A1JPB8_YERE8     |
| 3-oxoacyl-[acyl-carrier protein] reductase OS=Yersinia enterocolitica serotype O:8 / biotype 1B (strain 8081) GN=fabG PE=3 SV=1  | A1JN73_YERE8     |
| Cell division protein ftsZ OS=Yersinia enterocolitica serotype O:8 / biotype 1B (strain 8081) GN=ftsZ PE=3 SV=1                  | A1JUU8_YERE8     |
| Phosphoglycerate kinase OS=Yersinia enterocolitica serotype O:8 / biotype 1B (strain 8081) GN=pgk PE=3 SV=1                      | PGK_YERE8        |
| 3-oxoacyl-[acyl-carrier-protein] synthase I OS=Yersinia enterocolitica serotype O:8 / biotype 1B (strain 8081) GN=fabB PE=3 SV=1 | A1JKM0_YERE8     |
| Putative outer membrane porin F protein OS=Yersinia enterocolitica serotype O:8 / biotype 1B (strain 8081) GN=ompF PE=3 SV=1     | A1JMN7_YERE8     |
| DNA-directed RNA polymerase subunit alpha OS=Yersinia enterocolitica serotype O:8 / biotype 1B (strain 8081) GN=rpoA PE=3 SV=1   | RPOA_YERE8       |
| Ribose-phosphate pyrophosphokinase OS=Yersinia enterocolitica serotype O:8 / biotype 1B (strain 8081) GN=prsA PE=3 SV=1          | A1JRV4_YERE8     |
| ATP synthase subunit beta OS=Yersinia enterocolitica serotype O:8 / biotype 1B (strain 8081) GN=atpD PE=3 SV=1                   | ATPB_YERE8       |
| Lysyl-tRNA synthetase OS=Yersinia enterocolitica serotype O:8 / biotype 1B (strain 8081) GN=lysS PE=3 SV=1                       | SYK_YERE8        |
| <b>Secretion Wt Injected Proteins 3</b>                                                                                          | Accession Number |
| 60 kDa chaperonin OS=Yersinia enterocolitica serotype O:8 / biotype 1B (strain 8081) GN=groL PE=3 SV=1                           | CH60_YERE8       |
| Elongation factor Tu 1 OS=Yersinia enterocolitica serotype O:8 / biotype 1B (strain 8081) GN=tuf1 PE=3 SV=1                      | EFTU1_YERE8      |
| Yop effector YopE OS=Yersinia enterocolitica GN=yopE PE=4 SV=1                                                                   | Q7BRY7_YEREN     |
| Yop effector YopH OS=Yersinia enterocolitica GN=yopH PE=4 SV=1                                                                   | Q7BRY8_YEREN     |
| Chaperone protein htpG OS=Yersinia enterocolitica serotype O:8 / biotype 1B (strain 8081) GN=htpG PE=3 SV=1                      | HTPG_YERE8       |
| Chaperone protein dnaK OS=Yersinia enterocolitica serotype O:8 / biotype 1B (strain 8081) GN=dnaK PE=2 SV=1                      | DNAK_YERE8       |

|                                                                                                                                                         |              |
|---------------------------------------------------------------------------------------------------------------------------------------------------------|--------------|
| Clp ATPase OS=Yersinia enterocolitica serotype O:8 / biotype 1B (strain 8081) GN=clpB PE=3 SV=1                                                         | A1JK85_YERE8 |
| Enolase OS=Yersinia enterocolitica serotype O:8 / biotype 1B (strain 8081) GN=eno PE=3 SV=1                                                             | ENO_YERE8    |
| Glyceraldehyde 3-phosphate dehydrogenase A OS=Yersinia enterocolitica serotype O:8 / biotype 1B (strain 8081) GN=gapA PE=3 SV=1                         | A1JQH1_YERE8 |
| YopD OS=Yersinia enterocolitica GN=yopD PE=4 SV=1                                                                                                       | C5IZG7_YEREN |
| Elongation factor Ts OS=Yersinia enterocolitica serotype O:8 / biotype 1B (strain 8081) GN=tsf PE=3 SV=1                                                | EFTS_YERE8   |
| Elongation factor G OS=Yersinia enterocolitica serotype O:8 / biotype 1B (strain 8081) GN=fusA PE=3 SV=1                                                | A1JS54_YERE8 |
| Ribosome-recycling factor OS=Yersinia enterocolitica serotype O:8 / biotype 1B (strain 8081) GN=frr PE=3 SV=1                                           | RRF_YERE8    |
| Phosphoglycerate kinase OS=Yersinia enterocolitica serotype O:8 / biotype 1B (strain 8081) GN=pgk PE=3 SV=1                                             | PGK_YERE8    |
| Elongation factor Tu A (Fragment) OS=Yersinia enterocolitica GN=tufA PE=4 SV=1                                                                          | B6RBB1_YEREN |
| 3-oxoacyl-[acyl-carrier-protein] synthase I OS=Yersinia enterocolitica serotype O:8 / biotype 1B (strain 8081) GN=fabB PE=3 SV=1                        | A1JKM0_YERE8 |
| Serine hydroxymethyltransferase OS=Yersinia enterocolitica serotype O:8 / biotype 1B (strain 8081) GN=glyA PE=3 SV=1                                    | GLYA_YERE8   |
| ATP-dependent protease ATPase subunit HslU OS=Yersinia enterocolitica serotype O:8 / biotype 1B (strain 8081) GN=hslU PE=3 SV=1                         | HSLU_YERE8   |
| Trigger factor OS=Yersinia enterocolitica serotype O:8 / biotype 1B (strain 8081) GN=tig PE=3 SV=1                                                      | TIG_YERE8    |
| Putative alkyl hydroperoxide reductase subunit c OS=Yersinia enterocolitica serotype O:8 / biotype 1B (strain 8081) GN=ahpC PE=4 SV=1                   | A1JNT6_YERE8 |
| Formate acetyltransferase 1 OS=Yersinia enterocolitica serotype O:8 / biotype 1B (strain 8081) GN=pfIB PE=1 SV=1                                        | A1JMG9_YERE8 |
| Aldehyde-alcohol dehydrogenase OS=Yersinia enterocolitica serotype O:8 / biotype 1B (strain 8081) GN=adhE PE=4 SV=1                                     | A1JQ89_YERE8 |
| Fructose-bisphosphate aldolase class II OS=Yersinia enterocolitica serotype O:8 / biotype 1B (strain 8081) GN=fbaA PE=4 SV=1                            | A1JPQ8_YERE8 |
| ATP synthase subunit alpha OS=Yersinia enterocolitica serotype O:8 / biotype 1B (strain 8081) GN=atpA PE=3 SV=1                                         | ATPA_YERE8   |
| Putative exported protein OS=Yersinia enterocolitica serotype O:8 / biotype 1B (strain 8081) GN=cpxP PE=3 SV=1                                          | A1JHZ1_YERE8 |
| 3-oxoacyl-[acyl-carrier protein] reductase OS=Yersinia enterocolitica serotype O:8 / biotype 1B (strain 8081) GN=fabG PE=3 SV=1                         | A1JN73_YERE8 |
| Transaldolase OS=Yersinia enterocolitica serotype O:8 / biotype 1B (strain 8081) GN=tal PE=3 SV=1                                                       | TAL_YERE8    |
| Methionyl-tRNA synthetase OS=Yersinia enterocolitica serotype O:8 / biotype 1B (strain 8081) GN=metG PE=3 SV=1                                          | SYM_YERE8    |
| LcrV OS=Yersinia enterocolitica GN=lcrV PE=4 SV=1                                                                                                       | O87495_YEREN |
| YopN OS=Yersinia enterocolitica GN=yopN PE=4 SV=1                                                                                                       | O68333_YEREN |
| DNA protection during starvation protein OS=Yersinia enterocolitica serotype O:8 / biotype 1B (strain 8081) GN=dps PE=3 SV=1                            | DPS_YERE8    |
| 30S ribosomal protein S1 OS=Yersinia enterocolitica serotype O:8 / biotype 1B (strain 8081) GN=rpsA PE=4 SV=1                                           | A1JMI7_YERE8 |
| DNA-directed RNA polymerase subunit alpha OS=Yersinia enterocolitica serotype O:8 / biotype 1B (strain 8081) GN=rpoA PE=3 SV=1                          | RPOA_YERE8   |
| PTS system, mannose-specific IIAB component OS=Yersinia enterocolitica serotype O:8 / biotype 1B (strain 8081) GN=manX PE=4 SV=1                        | A1JMB5_YERE8 |
| Deoxyribose-phosphate aldolase OS=Yersinia enterocolitica serotype O:8 / biotype 1B (strain 8081) GN=deoC PE=3 SV=1                                     | DEOC_YERE8   |
| 50S ribosomal protein L10 OS=Yersinia enterocolitica serotype O:8 / biotype 1B (strain 8081) GN=rpLJ PE=3 SV=1                                          | RL10_YERE8   |
| Attachment invasion locus protein OS=Yersinia enterocolitica GN=ail PE=4 SV=1                                                                           | D7PM19_YEREN |
| Phosphoribosylaminoimidazole-succinocarboxamide synthase OS=Yersinia enterocolitica serotype O:8 / biotype 1B (strain 8081) GN=purC PE=3 SV=1           | PUR7_YERE8   |
| 30S ribosomal protein S3 OS=Yersinia enterocolitica serotype O:8 / biotype 1B (strain 8081) GN=rpsC PE=3 SV=1                                           | RS3_YERE8    |
| Putative exported protein OS=Yersinia enterocolitica serotype O:8 / biotype 1B (strain 8081) GN=YE3039 PE=3 SV=1                                        | A1JP43_YERE8 |
| Branched-chain amino acid-binding protein OS=Yersinia enterocolitica serotype O:8 / biotype 1B (strain 8081) GN=livK PE=3 SV=1                          | A1JIC6_YERE8 |
| 2,3,4,5-tetrahydropyridine-2,6-dicarboxylate N-succinyltransferase OS=Yersinia enterocolitica serotype O:8 / biotype 1B (strain 8081) GN=dapD PE=3 SV=1 | DAPD_YERE8   |
| 30S ribosomal protein S5 OS=Yersinia enterocolitica serotype O:8 / biotype 1B (strain 8081) GN=rpsE PE=3 SV=1                                           | RS5_YERE8    |
| Phosphate acetyltransferase OS=Yersinia enterocolitica serotype O:8 / biotype 1B (strain 8081) GN=pta PE=4 SV=1                                         | A1JLD1_YERE8 |

|                                                                                                                                        |              |
|----------------------------------------------------------------------------------------------------------------------------------------|--------------|
| 50S ribosomal protein L1 OS=Yersinia enterocolitica serotype O:8 / biotype 1B (strain 8081) GN=rplA PE=3 SV=1                          | RL1_YERE8    |
| 50S ribosomal protein L4 OS=Yersinia enterocolitica serotype O:8 / biotype 1B (strain 8081) GN=rplD PE=3 SV=1                          | RL4_YERE8    |
| 50S ribosomal protein L9 OS=Yersinia enterocolitica serotype O:8 / biotype 1B (strain 8081) GN=rplI PE=3 SV=1                          | RL9_YERE8    |
| Putative inner membrane protein OS=Yersinia enterocolitica serotype O:8 / biotype 1B (strain 8081) GN=YE2442 PE=4 SV=1                 | A1JRX6_YERE8 |
| 50S ribosomal protein L3 OS=Yersinia enterocolitica serotype O:8 / biotype 1B (strain 8081) GN=rplC PE=3 SV=1                          | RL3_YERE8    |
| Global stress requirement protein GsrA OS=Yersinia enterocolitica serotype O:8 / biotype 1B (strain 8081) GN=gsrA PE=3 SV=1            | A1JQ8_YERE8  |
| Putative exported protein OS=Yersinia enterocolitica serotype O:8 / biotype 1B (strain 8081) GN=YE2166 PE=3 SV=1                       | A1JPB8_YERE8 |
| Secreted thiol:disulfide interchange protein DsbA OS=Yersinia enterocolitica serotype O:8 / biotype 1B (strain 8081) GN=dsbA PE=3 SV=1 | A1JHT2_YERE8 |
| Pyruvate kinase OS=Yersinia enterocolitica serotype O:8 / biotype 1B (strain 8081) GN=pykF PE=3 SV=1                                   | A1JPB0_YERE8 |
| Virulence plasmid protein OS=Yersinia enterocolitica serotype O:8 / biotype 1B (strain 8081) GN=yopQ PE=4 SV=1                         | A1JU64_YERE8 |
| PTS sytem, enzyme I component OS=Yersinia enterocolitica serotype O:8 / biotype 1B (strain 8081) GN=ptsI PE=3 SV=1                     | A1JL94_YERE8 |
| Probable alcohol dehydrogenase OS=Yersinia enterocolitica serotype O:8 / biotype 1B (strain 8081) GN=YE2821 PE=3 SV=1                  | A1JU12_YERE8 |
| Oligopeptidase A OS=Yersinia enterocolitica serotype O:8 / biotype 1B (strain 8081) GN=opdA PE=3 SV=1                                  | A1JSQ3_YERE8 |
| ATP synthase subunit beta OS=Yersinia enterocolitica serotype O:8 / biotype 1B (strain 8081) GN=atpD PE=3 SV=1                         | ATPB_YERE8   |
| Yop effector YopP OS=Yersinia enterocolitica GN=yopP PE=4 SV=1                                                                         | O52162_YEREN |
| Beta-lactamase OS=Yersinia enterocolitica serotype O:8 / biotype 1B (strain 8081) GN=ampC PE=4 SV=1                                    | A1JRW9_YERE8 |
| DNA-directed RNA polymerase subunit beta' OS=Yersinia enterocolitica serotype O:8 / biotype 1B (strain 8081) GN=rpoC PE=3 SV=1         | RPOC_YERE8   |
| Glutathione S-transferase OS=Yersinia enterocolitica serotype O:8 / biotype 1B (strain 8081) GN=gst PE=4 SV=1                          | A1JNU4_YERE8 |
| 30S ribosomal protein S4 OS=Yersinia enterocolitica serotype O:8 / biotype 1B (strain 8081) GN=rpsD PE=3 SV=1                          | RS4_YERE8    |
| 50S ribosomal protein L11 OS=Yersinia enterocolitica serotype O:8 / biotype 1B (strain 8081) GN=rplK PE=3 SV=1                         | RL11_YERE8   |
| 50S ribosomal protein L2 OS=Yersinia enterocolitica serotype O:8 / biotype 1B (strain 8081) GN=rplB PE=3 SV=1                          | RL2_YERE8    |
| Uridylate kinase OS=Yersinia enterocolitica serotype O:8 / biotype 1B (strain 8081) GN=pyrH PE=3 SV=1                                  | PYRH_YERE8   |
| Adenylate kinase OS=Yersinia enterocolitica serotype O:8 / biotype 1B (strain 8081) GN=adk PE=3 SV=1                                   | KAD_YERE8    |
| Acetate kinase OS=Yersinia enterocolitica serotype O:8 / biotype 1B (strain 8081) GN=ackA PE=3 SV=1                                    | A1JLD2_YERE8 |
| DNA-binding protein Hns OS=Yersinia enterocolitica serotype O:8 / biotype 1B (strain 8081) GN=hns PE=4 SV=1                            | A1JQA0_YERE8 |
| Transketolase 1 OS=Yersinia enterocolitica serotype O:8 / biotype 1B (strain 8081) GN=tktA PE=4 SV=1                                   | A1JPR2_YERE8 |
| GMP synthase [glutamine-hydrolyzing] OS=Yersinia enterocolitica serotype O:8 / biotype 1B (strain 8081) GN=guaA PE=3 SV=1              | GUAA_YERE8   |
| Peptidyl-prolyl cis-trans isomerase OS=Yersinia enterocolitica serotype O:8 / biotype 1B (strain 8081) GN=ppiB PE=3 SV=1               | A1JNQ1_YERE8 |
| 50S ribosomal protein L15 OS=Yersinia enterocolitica serotype O:8 / biotype 1B (strain 8081) GN=rplO PE=3 SV=1                         | RL15_YERE8   |
| Protein tolB OS=Yersinia enterocolitica serotype O:8 / biotype 1B (strain 8081) GN=tolB PE=3 SV=1                                      | TOLB_YERE8   |
| Malate dehydrogenase OS=Yersinia enterocolitica serotype O:8 / biotype 1B (strain 8081) GN=mdh PE=3 SV=1                               | MDH_YERE8    |
| 30S ribosomal protein S7 OS=Yersinia enterocolitica serotype O:8 / biotype 1B (strain 8081) GN=rpsG PE=3 SV=1                          | RS7_YERE8    |
| Cell division protein ftsZ OS=Yersinia enterocolitica serotype O:8 / biotype 1B (strain 8081) GN=ftsZ PE=3 SV=1                        | A1JJJ8_YERE8 |
| 30S ribosomal protein S9 OS=Yersinia enterocolitica serotype O:8 / biotype 1B (strain 8081) GN=rpsI PE=3 SV=1                          | RS9_YERE8    |
| DnaK suppressor protein homologue OS=Yersinia enterocolitica serotype O:8 / biotype 1B (strain 8081) GN=dksA PE=4 SV=1                 | A1JJP2_YERE8 |
| 50S ribosomal protein L17 OS=Yersinia enterocolitica serotype O:8 / biotype 1B (strain 8081) GN=rplQ PE=3 SV=1                         | RL17_YERE8   |
| Translation initiation factor IF-3 OS=Yersinia enterocolitica serotype O:8 / biotype 1B (strain 8081) GN=infc PE=3 SV=1                | IF3_YERE8    |
| 10 kDa chaperonin OS=Yersinia enterocolitica serotype O:8 / biotype 1B (strain 8081) GN=groS PE=3 SV=1                                 | CH10_YERE8   |
| DNA-directed RNA polymerase subunit beta OS=Yersinia enterocolitica serotype O:8 / biotype 1B (strain 8081) GN=rpoB PE=3 SV=1          | RPOB_YERE8   |

|                                                                                                                                                 |              |
|-------------------------------------------------------------------------------------------------------------------------------------------------|--------------|
| 6-phosphofructokinase OS=Yersinia enterocolitica serotype O:8 / biotype 1B (strain 8081) GN=pfkA PE=3 SV=1                                      | K6PF_YERE8   |
| Outer membrane protein C, porin OS=Yersinia enterocolitica serotype O:8 / biotype 1B (strain 8081) GN=meoA PE=3 SV=1                            | A1JLE1_YERE8 |
| Putative exported protein OS=Yersinia enterocolitica serotype O:8 / biotype 1B (strain 8081) GN=yrbC PE=3 SV=1                                  | A1JRA6_YERE8 |
| Putative D-ribose-binding periplasmic protein OS=Yersinia enterocolitica serotype O:8 / biotype 1B (strain 8081) GN=rbsB PE=3 SV=1              | A1JHS3_YERE8 |
| Cationic 19 kDa outer membrane protein OS=Yersinia enterocolitica serotype O:8 / biotype 1B (strain 8081) GN=ompH PE=3 SV=1                     | A1JP72_YERE8 |
| Adhesin yadA OS=Yersinia enterocolitica GN=yadA PE=1 SV=1                                                                                       | YADA1_YEREN  |
| UPF0234 protein YE3147 OS=Yersinia enterocolitica serotype O:8 / biotype 1B (strain 8081) GN=YE3147 PE=3 SV=1                                   | Y3147_YERE8  |
| Putative uncharacterized protein OS=Yersinia enterocolitica serotype O:8 / biotype 1B (strain 8081) GN=YE1738 PE=4 SV=1                         | A1JLU4_YERE8 |
| Yop effector YopM OS=Yersinia enterocolitica GN=yopM PE=4 SV=1                                                                                  | P74988_YEREN |
| Cysteine synthase OS=Yersinia enterocolitica serotype O:8 / biotype 1B (strain 8081) GN=cysK PE=3 SV=1                                          | A1JL97_YERE8 |
| Single-stranded DNA-binding protein OS=Yersinia enterocolitica serotype O:8 / biotype 1B (strain 8081) GN=ssb PE=4 SV=1                         | A1JRR5_YERE8 |
| 30S ribosomal protein S8 OS=Yersinia enterocolitica serotype O:8 / biotype 1B (strain 8081) GN=rpsH PE=3 SV=1                                   | RS8_YERE8    |
| UPF0304 protein YE1336 OS=Yersinia enterocolitica serotype O:8 / biotype 1B (strain 8081) GN=YE1336 PE=3 SV=1                                   | Y1336_YERE8  |
| Galactose-binding protein OS=Yersinia enterocolitica serotype O:8 / biotype 1B (strain 8081) GN=mgIB PE=3 SV=1                                  | A1JU06_YERE8 |
| NADH:flavin oxidoreductase / NADH oxidase family protein OS=Yersinia enterocolitica serotype O:8 / biotype 1B (strain 8081) GN=YE2152 PE=4 SV=1 | A1JP27_YERE8 |
| cAMP-regulatory protein OS=Yersinia enterocolitica serotype O:8 / biotype 1B (strain 8081) GN=crp PE=4 SV=1                                     | A1JS98_YERE8 |
| Uracil phosphoribosyltransferase OS=Yersinia enterocolitica serotype O:8 / biotype 1B (strain 8081) GN=upp PE=3 SV=1                            | UPP_YERE8    |
| Putative stringent starvation protein A OS=Yersinia enterocolitica serotype O:8 / biotype 1B (strain 8081) GN=sspA PE=4 SV=1                    | A1JR91_YERE8 |
| Putative lipoprotein OS=Yersinia enterocolitica serotype O:8 / biotype 1B (strain 8081) GN=YE1703 PE=4 SV=1                                     | A1JME2_YERE8 |
| PTS system, glucose-specific IIA component OS=Yersinia enterocolitica serotype O:8 / biotype 1B (strain 8081) GN=crr PE=4 SV=1                  | A1JL89_YERE8 |
| Ribose-phosphate pyrophosphokinase OS=Yersinia enterocolitica serotype O:8 / biotype 1B (strain 8081) GN=prsA PE=3 SV=1                         | A1JRV4_YERE8 |
| UPF0082 protein YE2395 OS=Yersinia enterocolitica serotype O:8 / biotype 1B (strain 8081) GN=YE2395 PE=3 SV=1                                   | Y2395_YERE8  |
| Biotin carboxylase OS=Yersinia enterocolitica serotype O:8 / biotype 1B (strain 8081) GN=accC PE=4 SV=1                                         | A1JRK3_YERE8 |
| D-lactate dehydrogenase OS=Yersinia enterocolitica serotype O:8 / biotype 1B (strain 8081) GN=ldhA PE=4 SV=1                                    | A1JN94_YERE8 |
| Thioredoxin reductase OS=Yersinia enterocolitica serotype O:8 / biotype 1B (strain 8081) GN=trxB PE=3 SV=1                                      | A1JME7_YERE8 |
| Putative lipoprotein OS=Yersinia enterocolitica serotype O:8 / biotype 1B (strain 8081) GN=YE1719 PE=3 SV=1                                     | A1JLF7_YERE8 |
| Heat-shock chaperonin OS=Yersinia enterocolitica serotype O:8 / biotype 1B (strain 8081) GN=hsfO PE=3 SV=1                                      | A1JSE6_YERE8 |
| Protease OS=Yersinia enterocolitica serotype O:8 / biotype 1B (strain 8081) GN=degQ PE=3 SV=1                                                   | A1JR98_YERE8 |
| Asparaginyl-tRNA synthetase OS=Yersinia enterocolitica serotype O:8 / biotype 1B (strain 8081) GN=asnS PE=3 SV=1                                | SYN_YERE8    |
| Seryl-tRNA synthetase OS=Yersinia enterocolitica serotype O:8 / biotype 1B (strain 8081) GN=serS PE=3 SV=1                                      | SYS_YERE8    |
| Transcription antitermination protein nusG OS=Yersinia enterocolitica serotype O:8 / biotype 1B (strain 8081) GN=nusG PE=3 SV=1                 | A1JIH5_YERE8 |
| Phosphoheptose isomerase OS=Yersinia enterocolitica serotype O:8 / biotype 1B (strain 8081) GN=gmhA PE=3 SV=1                                   | GMHA_YERE8   |
| Putative exported protein OS=Yersinia enterocolitica serotype O:8 / biotype 1B (strain 8081) GN=YE3737 PE=3 SV=1                                | A1JR88_YERE8 |
| Putative NAD(P)H-dependent FMN reductase OS=Yersinia enterocolitica serotype O:8 / biotype 1B (strain 8081) GN=ssuE PE=3 SV=1                   | A1JT96_YERE8 |
| 50S ribosomal protein L16 OS=Yersinia enterocolitica serotype O:8 / biotype 1B (strain 8081) GN=rpIP PE=3 SV=1                                  | RL16_YERE8   |
| Triosephosphate isomerase OS=Yersinia enterocolitica serotype O:8 / biotype 1B (strain 8081) GN=tpiA PE=3 SV=1                                  | TPIS_YERE8   |
| ABC transporter protein, ATP-binding component OS=Yersinia enterocolitica serotype O:8 / biotype 1B (strain 8081) GN=YE0584 PE=4 SV=1           | A1JJB0_YERE8 |
| Peptidoglycan-associated lipoprotein Pal OS=Yersinia enterocolitica serotype O:8 / biotype 1B (strain 8081) GN=pal PE=3                         | A1JRK6_YERE8 |

|                                                                                                                                       |                  |
|---------------------------------------------------------------------------------------------------------------------------------------|------------------|
| SV=1                                                                                                                                  |                  |
| Bifunctional purine biosynthesis protein purH OS=Yersinia enterocolitica serotype O:8 / biotype 1B (strain 8081)<br>GN=purH PE=3 SV=1 | PUR9_YERE8       |
| <b>Secretion Wt Injected Proteins 4</b>                                                                                               | Accession Number |
| Translocator protein OS=Yersinia enterocolitica serotype O:8 / biotype 1B (strain 8081) GN=yopD PE=4 SV=1                             | A1JU70_YERE8     |
| Yop effector YopE OS=Yersinia enterocolitica GN=yopE PE=4 SV=1                                                                        | Q7BRY7_YEREN     |
| Type III secretion outer membrane protein OS=Yersinia enterocolitica serotype O:8 / biotype 1B (strain 8081) GN=yopN<br>PE=4          | A1JU81_YERE8     |
| Yop effector YopH OS=Yersinia enterocolitica GN=yopH PE=4 SV=1                                                                        | Q7BRY8_YEREN     |
| Virulence-associated V antigen OS=Yersinia enterocolitica serotype O:8 / biotype 1B (strain 8081) GN=lcrV PE=4 SV=1                   | A1JU73_YERE8     |
| Putative exported protein OS=Yersinia enterocolitica serotype O:8 / biotype 1B (strain 8081) GN=YE3039 PE=3 SV=1                      | A1JP43_YERE8     |
| 60 kDa chaperonin OS=Yersinia enterocolitica serotype O:8 / biotype 1B (strain 8081) GN=groL PE=3 SV=1                                | CH60_YERE8       |
| Chaperone protein dnaK OS=Yersinia enterocolitica serotype O:8 / biotype 1B (strain 8081) GN=dnaK PE=2 SV=1                           | DNAK_YERE8       |
| Yop type III secretion system effector protein OS=Yersinia enterocolitica serotype O:8 / biotype 1B (strain 8081)<br>GN=yopM PE=4     | A1JU68_YERE8     |
| <b>Secretion Wt Injected Proteins 5</b>                                                                                               | Accession Number |
| Yop effector YopE OS=Yersinia enterocolitica GN=yopE PE=4 SV=1                                                                        | Q7BRY7_YEREN     |
| 60 kDa chaperonin OS=Yersinia enterocolitica serotype O:8 / biotype 1B (strain 8081) GN=groL PE=3 SV=1                                | CH60_YERE8       |
| Yop effector YopH OS=Yersinia enterocolitica GN=yopH PE=4 SV=1                                                                        | Q7BRY8_YEREN     |
| Virulence-associated V antigen OS=Yersinia enterocolitica serotype O:8 / biotype 1B (strain 8081) GN=lcrV PE=4 SV=1                   | A1JU73_YERE8     |
| Translocator protein OS=Yersinia enterocolitica serotype O:8 / biotype 1B (strain 8081) GN=yopD PE=4 SV=1                             | A1JU70_YERE8     |
| YopN OS=Yersinia enterocolitica GN=yopN PE=4 SV=1                                                                                     | O68333_YEREN     |
| Yop effector YopM OS=Yersinia enterocolitica GN=yopM PE=4 SV=1                                                                        | P74988_YEREN     |
| <b>Secretion Wt Injected Proteins 6</b>                                                                                               | Accession Number |
| LcrV OS=Yersinia enterocolitica GN=lcrV PE=4 SV=1                                                                                     | O87495_YEREN     |
| Yop effector YopE OS=Yersinia enterocolitica GN=yopE PE=4 SV=1                                                                        | Q7BRY7_YEREN     |
| YopD OS=Yersinia enterocolitica GN=yopD PE=4 SV=1                                                                                     | C5IZG7_YEREN     |
| YopN OS=Yersinia enterocolitica GN=yopN PE=4 SV=1                                                                                     | O68333_YEREN     |
| Yop effector YopH OS=Yersinia enterocolitica GN=yopH PE=4 SV=1                                                                        | Q7BRY8_YEREN     |
| Yop effector YopM OS=Yersinia enterocolitica GN=yopM PE=4 SV=1                                                                        | P74988_YEREN     |
| 60 kDa chaperonin OS=Yersinia enterocolitica serotype O:8 / biotype 1B (strain 8081) GN=groL PE=3 SV=1                                | CH60_YERE8       |
| <b>Secretion Mut Injected Proteins 1</b>                                                                                              | Accession Number |
| 60 kDa chaperonin OS=Yersinia enterocolitica serotype O:8 / biotype 1B (strain 8081) GN=groL PE=3 SV=1                                | CH60_YERE8       |
| Elongation factor Tu 1 OS=Yersinia enterocolitica serotype O:8 / biotype 1B (strain 8081) GN=tuf1 PE=3 SV=1                           | EFTU1_YERE8      |
| Chaperone protein dnaK OS=Yersinia enterocolitica serotype O:8 / biotype 1B (strain 8081) GN=dnaK PE=2 SV=1                           | DNAK_YERE8       |
| Chaperone protein htpG OS=Yersinia enterocolitica serotype O:8 / biotype 1B (strain 8081) GN=htpG PE=3 SV=1                           | HTPG_YERE8       |
| Enolase OS=Yersinia enterocolitica serotype O:8 / biotype 1B (strain 8081) GN=eno PE=3 SV=1                                           | ENO_YERE8        |
| Clp ATPase OS=Yersinia enterocolitica serotype O:8 / biotype 1B (strain 8081) GN=clpB PE=3 SV=1                                       | A1JK85_YERE8     |
| Glyceraldehyde 3-phosphate dehydrogenase A OS=Yersinia enterocolitica serotype O:8 / biotype 1B (strain 8081)<br>GN=gapA PE=3 SV=1    | A1JQH1_YERE8     |
| 50S ribosomal protein L1 OS=Yersinia enterocolitica serotype O:8 / biotype 1B (strain 8081) GN=rplA PE=3 SV=1                         | RL1_YERE8        |
| Branched-chain amino acid-binding protein OS=Yersinia enterocolitica serotype O:8 / biotype 1B (strain 8081) GN=livK<br>PE=3 SV=1     | A1JIC6_YERE8     |
| Global stress requirement protein GsrA OS=Yersinia enterocolitica serotype O:8 / biotype 1B (strain 8081) GN=gsrA PE=3<br>SV=1        | A1JJQ8_YERE8     |
| Elongation factor G OS=Yersinia enterocolitica serotype O:8 / biotype 1B (strain 8081) GN=fusA PE=3 SV=1                              | A1J554_YERE8     |

|                                                                                                                                       |                  |
|---------------------------------------------------------------------------------------------------------------------------------------|------------------|
| Elongation factor Ts OS=Yersinia enterocolitica serotype O:8 / biotype 1B (strain 8081) GN=tsf PE=3 SV=1                              | EFTS_YERE8       |
| 3-oxoacyl-[acyl-carrier-protein] synthase I OS=Yersinia enterocolitica serotype O:8 / biotype 1B (strain 8081) GN=fabB PE=3 SV=1      | A1JKM0_YERE8     |
| Ribosome-recycling factor OS=Yersinia enterocolitica serotype O:8 / biotype 1B (strain 8081) GN=frr PE=3 SV=1                         | RRF_YERE8        |
| Elongation factor Tu A (Fragment) OS=Yersinia enterocolitica GN=tufA PE=4 SV=1                                                        | B6RBB1_YEREN     |
| Trigger factor OS=Yersinia enterocolitica serotype O:8 / biotype 1B (strain 8081) GN=tig PE=3 SV=1                                    | TIG_YERE8        |
| Primosomal protein n' OS=Yersinia enterocolitica serotype O:8 / biotype 1B (strain 8081) GN=priA PE=4 SV=1                            | A1J12_YERE8      |
| Methionyl-tRNA synthetase OS=Yersinia enterocolitica serotype O:8 / biotype 1B (strain 8081) GN=metG PE=3 SV=1                        | SYM_YERE8        |
| ATP-dependent protease ATPase subunit HslU OS=Yersinia enterocolitica serotype O:8 / biotype 1B (strain 8081) GN=hslU PE=3 SV=1       | HSLU_YERE8       |
| Putative alkyl hydroperoxide reductase subunit c OS=Yersinia enterocolitica serotype O:8 / biotype 1B (strain 8081) GN=ahpC PE=4 SV=1 | A1JNT6_YERE8     |
| 50S ribosomal protein L10 OS=Yersinia enterocolitica serotype O:8 / biotype 1B (strain 8081) GN=rplJ PE=3 SV=1                        | RL10_YERE8       |
| 3-oxoacyl-[acyl-carrier protein] reductase OS=Yersinia enterocolitica serotype O:8 / biotype 1B (strain 8081) GN=fabG PE=3 SV=1       | A1JN73_YERE8     |
| Putative D-ribose-binding periplasmic protein OS=Yersinia enterocolitica serotype O:8 / biotype 1B (strain 8081) GN=rbsB PE=3 SV=1    | A1JHS3_YERE8     |
| PTS system, enzyme I component OS=Yersinia enterocolitica serotype O:8 / biotype 1B (strain 8081) GN=ptsl PE=3 SV=1                   | A1JL94_YERE8     |
| Aldehyde-alcohol dehydrogenase OS=Yersinia enterocolitica serotype O:8 / biotype 1B (strain 8081) GN=adhE PE=4 SV=1                   | A1JQ89_YERE8     |
| <b>Secretion Mut Injected Proteins 2</b>                                                                                              | Accession Number |
| 60 kDa chaperonin OS=Yersinia enterocolitica serotype O:8 / biotype 1B (strain 8081) GN=groL PE=3 SV=1                                | CH60_YERE8       |
| Elongation factor Tu 1 OS=Yersinia enterocolitica serotype O:8 / biotype 1B (strain 8081) GN=tuf1 PE=3 SV=1                           | EFTU1_YERE8      |
| Chaperone protein dnaK OS=Yersinia enterocolitica serotype O:8 / biotype 1B (strain 8081) GN=dnaK PE=2 SV=1                           | DNAK_YERE8       |
| Chaperone protein htpG OS=Yersinia enterocolitica serotype O:8 / biotype 1B (strain 8081) GN=htpG PE=3 SV=1                           | HTPG_YERE8       |
| Elongation factor G OS=Yersinia enterocolitica serotype O:8 / biotype 1B (strain 8081) GN=fusA PE=3 SV=1                              | A1J554_YERE8     |
| Putative exported protein OS=Yersinia enterocolitica serotype O:8 / biotype 1B (strain 8081) GN=YE3039 PE=3 SV=1                      | A1JP43_YERE8     |
| Methionyl-tRNA synthetase OS=Yersinia enterocolitica serotype O:8 / biotype 1B (strain 8081) GN=metG PE=3 SV=1                        | SYM_YERE8        |
| Trigger factor OS=Yersinia enterocolitica serotype O:8 / biotype 1B (strain 8081) GN=tig PE=3 SV=1                                    | TIG_YERE8        |
| Enolase OS=Yersinia enterocolitica serotype O:8 / biotype 1B (strain 8081) GN=eno PE=3 SV=1                                           | ENO_YERE8        |
| Elongation factor Tu A (Fragment) OS=Yersinia enterocolitica GN=tufA PE=4 SV=1                                                        | B6RBB1_YEREN     |
| Glyceraldehyde 3-phosphate dehydrogenase A OS=Yersinia enterocolitica serotype O:8 / biotype 1B (strain 8081) GN=gapA PE=3 SV=1       | A1JQH1_YERE8     |
| 3-oxoacyl-[acyl-carrier protein] reductase OS=Yersinia enterocolitica serotype O:8 / biotype 1B (strain 8081) GN=fabG PE=3 SV=1       | A1JN73_YERE8     |
| Elongation factor Ts OS=Yersinia enterocolitica serotype O:8 / biotype 1B (strain 8081) GN=tsf PE=3 SV=1                              | EFTS_YERE8       |
| Putative exported protein OS=Yersinia enterocolitica serotype O:8 / biotype 1B (strain 8081) GN=YE2166 PE=3 SV=1                      | A1JP88_YERE8     |
| Branched-chain amino acid-binding protein OS=Yersinia enterocolitica serotype O:8 / biotype 1B (strain 8081) GN=livK PE=3 SV=1        | A1JIC6_YERE8     |
| 3-oxoacyl-[acyl-carrier-protein] synthase I OS=Yersinia enterocolitica serotype O:8 / biotype 1B (strain 8081) GN=fabB PE=3 SV=1      | A1JKM0_YERE8     |
| <b>Secretion Mut Injected Proteins 3</b>                                                                                              | Accession Number |
| 60 kDa chaperonin OS=Yersinia enterocolitica serotype O:8 / biotype 1B (strain 8081) GN=groL PE=3 SV=1                                | CH60_YERE8       |
| Elongation factor Tu 1 OS=Yersinia enterocolitica serotype O:8 / biotype 1B (strain 8081) GN=tuf1 PE=3 SV=1                           | EFTU1_YERE8      |
| Chaperone protein dnaK OS=Yersinia enterocolitica serotype O:8 / biotype 1B (strain 8081) GN=dnaK PE=2 SV=1                           | DNAK_YERE8       |
| Clp ATPase OS=Yersinia enterocolitica serotype O:8 / biotype 1B (strain 8081) GN=clpB PE=3 SV=1                                       | A1JK85_YERE8     |
| Chaperone protein htpG OS=Yersinia enterocolitica serotype O:8 / biotype 1B (strain 8081) GN=htpG PE=3 SV=1                           | HTPG_YERE8       |
| Glyceraldehyde 3-phosphate dehydrogenase A OS=Yersinia enterocolitica serotype O:8 / biotype 1B (strain 8081) GN=gapA PE=3 SV=1       | A1JQH1_YERE8     |



|                                                                                                                                              |              |
|----------------------------------------------------------------------------------------------------------------------------------------------|--------------|
| Elongation factor Ts OS=Yersinia enterocolitica serotype O:8 / biotype 1B (strain 8081) GN=tsf PE=3 SV=1                                     | EFTS_YERE8   |
| Elongation factor G OS=Yersinia enterocolitica serotype O:8 / biotype 1B (strain 8081) GN=fusA PE=3 SV=1                                     | A1J554_YERE8 |
| Putative alkyl hydroperoxide reductase subunit c OS=Yersinia enterocolitica serotype O:8 / biotype 1B (strain 8081) GN=ahpC PE=4 SV=1        | A1JNT6_YERE8 |
| Enolase OS=Yersinia enterocolitica serotype O:8 / biotype 1B (strain 8081) GN=eno PE=3 SV=1                                                  | ENO_YERE8    |
| Flagellar hook-associated protein 2 OS=Yersinia enterocolitica serotype O:8 / biotype 1B (strain 8081) GN=fliD PE=4 SV=1                     | A1JSR2_YERE8 |
| Elongation factor Tu A (Fragment) OS=Yersinia enterocolitica GN=tufA PE=4 SV=1                                                               | B6RBB1_YEREN |
| Trigger factor OS=Yersinia enterocolitica serotype O:8 / biotype 1B (strain 8081) GN=tig PE=3 SV=1                                           | TIG_YERE8    |
| FliC OS=Yersinia enterocolitica GN=fliC PE=4 SV=1                                                                                            | C9EHF4_YEREN |
| 30S ribosomal protein S1 OS=Yersinia enterocolitica serotype O:8 / biotype 1B (strain 8081) GN=rpsA PE=4 SV=1                                | A1JMI7_YERE8 |
| ATP-dependent protease ATPase subunit HslU OS=Yersinia enterocolitica serotype O:8 / biotype 1B (strain 8081) GN=hslU PE=3 SV=1              | HSLU_YERE8   |
| Putative exported protein OS=Yersinia enterocolitica serotype O:8 / biotype 1B (strain 8081) GN=YE3039 PE=3 SV=1                             | A1JP43_YERE8 |
| Aldehyde-alcohol dehydrogenase OS=Yersinia enterocolitica serotype O:8 / biotype 1B (strain 8081) GN=adhE PE=4 SV=1                          | A1JQ89_YERE8 |
| Ribosome-recycling factor OS=Yersinia enterocolitica serotype O:8 / biotype 1B (strain 8081) GN=frr PE=3 SV=1                                | RRF_YERE8    |
| 3-oxoacyl-[acyl-carrier protein] reductase OS=Yersinia enterocolitica serotype O:8 / biotype 1B (strain 8081) GN=fabG PE=3 SV=1              | A1JN73_YERE8 |
| ATP synthase subunit beta OS=Yersinia enterocolitica serotype O:8 / biotype 1B (strain 8081) GN=atpD PE=3 SV=1                               | ATPB_YERE8   |
| ATP synthase subunit alpha OS=Yersinia enterocolitica serotype O:8 / biotype 1B (strain 8081) GN=atpA PE=3 SV=1                              | ATPA_YERE8   |
| 30S ribosomal protein S3 OS=Yersinia enterocolitica serotype O:8 / biotype 1B (strain 8081) GN=rpsC PE=3 SV=1                                | RS3_YERE8    |
| 3-oxoacyl-[acyl-carrier-protein] synthase I OS=Yersinia enterocolitica serotype O:8 / biotype 1B (strain 8081) GN=fabB PE=3 SV=1             | A1JKM0_YERE8 |
| DNA-directed RNA polymerase subunit alpha OS=Yersinia enterocolitica serotype O:8 / biotype 1B (strain 8081) GN=rpoA PE=3 SV=1               | RPOA_YERE8   |
| Global stress requirement protein GsrA OS=Yersinia enterocolitica serotype O:8 / biotype 1B (strain 8081) GN=gsrA PE=3 SV=1                  | A1JJQ8_YERE8 |
| Protease OS=Yersinia enterocolitica serotype O:8 / biotype 1B (strain 8081) GN=degQ PE=3 SV=1                                                | A1JR98_YERE8 |
| 50S ribosomal protein L3 OS=Yersinia enterocolitica serotype O:8 / biotype 1B (strain 8081) GN=rpL3 PE=3 SV=1                                | RL3_YERE8    |
| Fructose-bisphosphate aldolase class II OS=Yersinia enterocolitica serotype O:8 / biotype 1B (strain 8081) GN=fbaA PE=4 SV=1                 | A1JPQ8_YERE8 |
| Formate acetyltransferase 1 OS=Yersinia enterocolitica serotype O:8 / biotype 1B (strain 8081) GN=pfIB PE=1 SV=1                             | A1JMG9_YERE8 |
| Methionyl-tRNA synthetase OS=Yersinia enterocolitica serotype O:8 / biotype 1B (strain 8081) GN=metG PE=3 SV=1                               | SYM_YERE8    |
| Transaldolase OS=Yersinia enterocolitica serotype O:8 / biotype 1B (strain 8081) GN=tal PE=3 SV=1                                            | TAL_YERE8    |
| Adhesin, Ail protein OS=Yersinia enterocolitica (type O:3) GN=ail PE=4 SV=1                                                                  | Q70AM3_YEREN |
| 30S ribosomal protein S5 OS=Yersinia enterocolitica serotype O:8 / biotype 1B (strain 8081) GN=rpsE PE=3 SV=1                                | RS5_YERE8    |
| 50S ribosomal protein L4 OS=Yersinia enterocolitica serotype O:8 / biotype 1B (strain 8081) GN=rpL4 PE=3 SV=1                                | RL4_YERE8    |
| 50S ribosomal protein L9 OS=Yersinia enterocolitica serotype O:8 / biotype 1B (strain 8081) GN=rpL9 PE=3 SV=1                                | RL9_YERE8    |
| Putative inner membrane protein OS=Yersinia enterocolitica serotype O:8 / biotype 1B (strain 8081) GN=YE2442 PE=4 SV=1                       | A1JRX6_YERE8 |
| Putative exported protein OS=Yersinia enterocolitica serotype O:8 / biotype 1B (strain 8081) GN=cpxP PE=3 SV=1                               | A1JHZ1_YERE8 |
| PTS system, enzyme I component OS=Yersinia enterocolitica serotype O:8 / biotype 1B (strain 8081) GN=ptsI PE=3 SV=1                          | A1JL94_YERE8 |
| PTS system, mannose-specific IIA <sub>B</sub> component OS=Yersinia enterocolitica serotype O:8 / biotype 1B (strain 8081) GN=manX PE=4 SV=1 | A1JMB5_YERE8 |
| DNA protection during starvation protein OS=Yersinia enterocolitica serotype O:8 / biotype 1B (strain 8081) GN=dps PE=3 SV=1                 | DPS_YERE8    |
| Deoxyribose-phosphate aldolase OS=Yersinia enterocolitica serotype O:8 / biotype 1B (strain 8081) GN=deoC PE=3 SV=1                          | DEOC_YERE8   |
| 50S ribosomal protein L1 OS=Yersinia enterocolitica serotype O:8 / biotype 1B (strain 8081) GN=rpL1A PE=3 SV=1                               | RL1_YERE8    |
| Protein recA OS=Yersinia enterocolitica serotype O:8 / biotype 1B (strain 8081) GN=recA PE=3 SV=1                                            | RECA_YERE8   |

|                                                                                                                                                                     |                  |
|---------------------------------------------------------------------------------------------------------------------------------------------------------------------|------------------|
| 50S ribosomal protein L10 OS=Yersinia enterocolitica serotype O:8 / biotype 1B (strain 8081) GN=rplJ PE=3 SV=1                                                      | RL10_YERE8       |
| 50S ribosomal protein L17 OS=Yersinia enterocolitica serotype O:8 / biotype 1B (strain 8081) GN=rplQ PE=3 SV=1                                                      | RL17_YERE8       |
| Branched-chain amino acid-binding protein OS=Yersinia enterocolitica serotype O:8 / biotype 1B (strain 8081) GN=livK PE=3 SV=1                                      | A1JIC6_YERE8     |
| 50S ribosomal protein L5 OS=Yersinia enterocolitica serotype O:8 / biotype 1B (strain 8081) GN=rplE PE=3 SV=1                                                       | RL5_YERE8        |
| 30S ribosomal protein S2 OS=Yersinia enterocolitica serotype O:8 / biotype 1B (strain 8081) GN=rpsB PE=3 SV=1                                                       | RS2_YERE8        |
| Serine hydroxymethyltransferase OS=Yersinia enterocolitica serotype O:8 / biotype 1B (strain 8081) GN=glyA PE=3 SV=1                                                | GLYA_YERE8       |
| DNA-directed RNA polymerase subunit beta' OS=Yersinia enterocolitica serotype O:8 / biotype 1B (strain 8081) GN=rpoC PE=3 SV=1                                      | RPOC_YERE8       |
| Malate dehydrogenase OS=Yersinia enterocolitica serotype O:8 / biotype 1B (strain 8081) GN=mdh PE=3 SV=1                                                            | MDH_YERE8        |
| 30S ribosomal protein S4 OS=Yersinia enterocolitica serotype O:8 / biotype 1B (strain 8081) GN=rpsD PE=3 SV=1                                                       | RS4_YERE8        |
| Putative exported protein OS=Yersinia enterocolitica serotype O:8 / biotype 1B (strain 8081) GN=YE2166 PE=3 SV=1                                                    | A1JPB8_YERE8     |
| Probable alcohol dehydrogenase OS=Yersinia enterocolitica serotype O:8 / biotype 1B (strain 8081) GN=YE2821 PE=3 SV=1                                               | A1JU12_YERE8     |
| Translation initiation factor IF-3 OS=Yersinia enterocolitica serotype O:8 / biotype 1B (strain 8081) GN=infc PE=3 SV=1                                             | IF3_YERE8        |
| Primosomal protein n' OS=Yersinia enterocolitica serotype O:8 / biotype 1B (strain 8081) GN=priA PE=4 SV=1                                                          | A1JI12_YERE8     |
| Pyruvate kinase OS=Yersinia enterocolitica serotype O:8 / biotype 1B (strain 8081) GN=pykF PE=3 SV=1                                                                | A1JPB0_YERE8     |
| Cell division protein ftsZ OS=Yersinia enterocolitica serotype O:8 / biotype 1B (strain 8081) GN=ftsZ PE=3 SV=1                                                     | A1JJJ8_YERE8     |
| Yop effector YopE OS=Yersinia enterocolitica GN=yopE PE=4 SV=1                                                                                                      | Q7BRY7_YEREN     |
| Beta-lactamase OS=Yersinia enterocolitica serotype O:8 / biotype 1B (strain 8081) GN=ampC PE=4 SV=1                                                                 | A1JRW9_YERE8     |
| Dihydrolipoyl dehydrogenase OS=Yersinia enterocolitica serotype O:8 / biotype 1B (strain 8081) GN=lpdA PE=3 SV=1                                                    | A1JJM0_YERE8     |
| Asparaginyl-tRNA synthetase OS=Yersinia enterocolitica serotype O:8 / biotype 1B (strain 8081) GN=asnS PE=3 SV=1                                                    | SYN_YERE8        |
| Uridylate kinase OS=Yersinia enterocolitica serotype O:8 / biotype 1B (strain 8081) GN=pyrH PE=3 SV=1                                                               | PYRH_YERE8       |
| Putative membrane protein OS=Yersinia enterocolitica serotype O:8 / biotype 1B (strain 8081) GN=hflK PE=4 SV=1                                                      | A1JIR7_YERE8     |
| Ribose-phosphate pyrophosphokinase OS=Yersinia enterocolitica serotype O:8 / biotype 1B (strain 8081) GN=prsA PE=3 SV=1                                             | A1JRV4_YERE8     |
| UPF0234 protein YE3147 OS=Yersinia enterocolitica serotype O:8 / biotype 1B (strain 8081) GN=YE3147 PE=3 SV=1                                                       | Y3147_YERE8      |
| 50S ribosomal protein L2 OS=Yersinia enterocolitica serotype O:8 / biotype 1B (strain 8081) GN=rplB PE=3 SV=1                                                       | RL2_YERE8        |
| Triosephosphate isomerase OS=Yersinia enterocolitica serotype O:8 / biotype 1B (strain 8081) GN=tpiA PE=3 SV=1                                                      | TPIS_YERE8       |
| 50S ribosomal protein L11 OS=Yersinia enterocolitica serotype O:8 / biotype 1B (strain 8081) GN=rplK PE=3 SV=1                                                      | RL11_YERE8       |
| Peptidyl-prolyl cis-trans isomerase OS=Yersinia enterocolitica serotype O:8 / biotype 1B (strain 8081) GN=ppiB PE=3 SV=1                                            | A1JNQ1_YERE8     |
| Seryl-tRNA synthetase OS=Yersinia enterocolitica serotype O:8 / biotype 1B (strain 8081) GN=serS PE=3 SV=1                                                          | SYS_YERE8        |
| 30S ribosomal protein S7 OS=Yersinia enterocolitica serotype O:8 / biotype 1B (strain 8081) GN=rpsG PE=3 SV=1                                                       | RS7_YERE8        |
| Outer membrane porin protein OS=Yersinia enterocolitica serotype O:8 / biotype 1B (strain 8081) GN=YE2463 PE=4 SV=1                                                 | A1JS30_YERE8     |
| Dihydrolipoamide acetyltransferase component of pyruvate dehydrogenase complex OS=Yersinia enterocolitica serotype O:8 / biotype 1B (strain 8081) GN=aceF PE=3 SV=1 | A1JL9_YERE8      |
| Flagellar hook-associated protein 1 OS=Yersinia enterocolitica serotype O:8 / biotype 1B (strain 8081) GN=flgK PE=3 SV=1                                            | A1JS27_YERE8     |
| <b>Secretion Mut Injected Proteins 4</b>                                                                                                                            | Accession Number |
| 60 kDa chaperonin OS=Yersinia enterocolitica serotype O:8 / biotype 1B (strain 8081) GN=groL PE=3 SV=1                                                              | CH60_YERE8       |
| Elongation factor Tu 1 OS=Yersinia enterocolitica serotype O:8 / biotype 1B (strain 8081) GN=tuf1 PE=3 SV=1                                                         | EFTU1_YERE8      |
| Enolase OS=Yersinia enterocolitica serotype O:8 / biotype 1B (strain 8081) GN=eno PE=3 SV=1                                                                         | ENO_YERE8        |
| Glyceraldehyde 3-phosphate dehydrogenase A OS=Yersinia enterocolitica serotype O:8 / biotype 1B (strain 8081) GN=gapA PE=3                                          | A1JQH1_YERE8     |
| Chaperone protein dnaK OS=Yersinia enterocolitica serotype O:8 / biotype 1B (strain 8081) GN=dnaK PE=2 SV=1                                                         | DNAK_YERE8       |
| Putative exported protein OS=Yersinia enterocolitica serotype O:8 / biotype 1B (strain 8081) GN=cpxP PE=3 SV=1                                                      | A1JHZ1_YERE8     |

|                                                                                                                            |                  |
|----------------------------------------------------------------------------------------------------------------------------|------------------|
| Outer membrane porin protein OS=Yersinia enterocolitica serotype O:8 / biotype 1B (strain 8081) GN=YE2463 PE=4 SV=1        | A1J530_YERE8     |
| Putative exported protein OS=Yersinia enterocolitica serotype O:8 / biotype 1B (strain 8081) GN=YE2166 PE=3 SV=1           | A1JPB8_YERE8     |
| <b>Secretion Mut Injected Proteins 5</b>                                                                                   | Accession Number |
| 60 kDa chaperonin OS=Yersinia enterocolitica serotype O:8 / biotype 1B (strain 8081) GN=groL PE=3 SV=1                     | CH60_YERE8       |
| Elongation factor Tu 1 OS=Yersinia enterocolitica serotype O:8 / biotype 1B (strain 8081) GN=tuf1 PE=3 SV=1                | EFTU1_YERE8      |
| Enolase OS=Yersinia enterocolitica serotype O:8 / biotype 1B (strain 8081) GN=eno PE=3 SV=1                                | ENO_YERE8        |
| Chaperone protein dnaK OS=Yersinia enterocolitica serotype O:8 / biotype 1B (strain 8081) GN=dnaK PE=2 SV=1                | DNAK_YERE8       |
| Glyceraldehyde 3-phosphate dehydrogenase A OS=Yersinia enterocolitica serotype O:8 / biotype 1B (strain 8081) GN=gapA PE=3 | A1JQH1_YERE8     |
| Outer membrane porin protein OS=Yersinia enterocolitica serotype O:8 / biotype 1B (strain 8081) GN=YE2463 PE=4 SV=1        | A1J530_YERE8     |
| Attachment invasion locus protein OS=Yersinia enterocolitica GN=ail PE=4 SV=1                                              | D7PM19_YEREN     |
| Putative exported protein OS=Yersinia enterocolitica serotype O:8 / biotype 1B (strain 8081) GN=YE2166 PE=3 SV=1           | A1JPB8_YERE8     |
| <b>Secretion Mut Injected Proteins 6</b>                                                                                   | Accession Number |
| Chaperone protein dnaK OS=Yersinia enterocolitica serotype O:8 / biotype 1B (strain 8081) GN=dnaK PE=2 SV=1                | DNAK_YERE8       |
| Attachment invasion locus protein OS=Yersinia enterocolitica GN=ail PE=4 SV=1                                              | D7PM19_YEREN     |
| <b>Pulsed AnI labeling, 0-30 min</b>                                                                                       | Accession Number |
| 60 kDa chaperonin OS=Yersinia enterocolitica serotype O:8 / biotype 1B (strain 8081) GN=groL PE=3 SV=1                     | CH60_YERE8       |
| Elongation factor Tu 1 OS=Yersinia enterocolitica serotype O:8 / biotype 1B (strain 8081) GN=tuf1 PE=3 SV=1                | EFTU1_YERE8      |
| Major outer membrane lipoprotein OS=Yersinia enterocolitica serotype O:8 / biotype 1B (strain 8081) GN=lpp PE=3 SV=1       | A1JPB4_YERE8     |
| 30S ribosomal protein S3 OS=Yersinia enterocolitica serotype O:8 / biotype 1B (strain 8081) GN=rpsC PE=3 SV=1              | RS3_YERE8        |
| 50S ribosomal protein L1 OS=Yersinia enterocolitica serotype O:8 / biotype 1B (strain 8081) GN=rplA PE=3 SV=1              | RL1_YERE8        |
| Putative uncharacterized protein OS=Yersinia enterocolitica serotype O:8 / biotype 1B (strain 8081) GN=YE3042 PE=4 SV=1    | A1JNW8_YERE8     |
| Elongation factor Tu A (Fragment) OS=Yersinia enterocolitica GN=tufA PE=4 SV=1                                             | B6RBB1_YEREN     |
| Elongation factor Tu (Fragment) OS=Yersinia enterocolitica GN=tuf PE=4 SV=1                                                | D1MWR3_YEREN     |
| Elongation factor Ts OS=Yersinia enterocolitica serotype O:8 / biotype 1B (strain 8081) GN=tsf PE=3 SV=1                   | EFTS_YERE8       |
| Flagellar basal-body rod protein flgB OS=Yersinia enterocolitica GN=flgB PE=3 SV=3                                         | FLGB_YEREN       |
| Putative exported protein OS=Yersinia enterocolitica serotype O:8 / biotype 1B (strain 8081) GN=YE1132 PE=3 SV=1           | A1JL02_YERE8     |
| YopD OS=Yersinia enterocolitica GN=yopD PE=4 SV=1                                                                          | DOFH99_YEREN     |
| Preprotein translocase subunit secY OS=Yersinia enterocolitica serotype O:8 / biotype 1B (strain 8081) GN=secY PE=3 SV=1   | A1J507_YERE8     |
| Citrate lyase acyl carrier protein OS=Yersinia enterocolitica serotype O:8 / biotype 1B (strain 8081) GN=citD PE=3 SV=1    | CITD_YERE8       |
| DNA-binding protein Hns OS=Yersinia enterocolitica serotype O:8 / biotype 1B (strain 8081) GN=hns PE=4 SV=1                | A1JQA0_YERE8     |
| Pseudouridine synthase OS=Yersinia enterocolitica serotype O:8 / biotype 1B (strain 8081) GN=rLuA PE=3 SV=1                | A1JF9_YERE8      |
| Putative exported protein OS=Yersinia enterocolitica serotype O:8 / biotype 1B (strain 8081) GN=YE3439 PE=3 SV=1           | A1JPV0_YERE8     |
| <b>Pulsed AnI labeling, 30-60 min</b>                                                                                      | Accession Number |
| Outer membrane virulence protein yopE OS=Yersinia enterocolitica GN=yopE PE=2 SV=1                                         | YOPE_YEREN       |
| 60 kDa chaperonin OS=Yersinia enterocolitica serotype O:8 / biotype 1B (strain 8081) GN=groL PE=3 SV=1                     | CH60_YERE8       |
| Tyrosine-protein phosphatase yopH OS=Yersinia enterocolitica GN=yopH PE=1 SV=1                                             | YOPH_YEREN       |
| Major outer membrane lipoprotein OS=Yersinia enterocolitica serotype O:8 / biotype 1B (strain 8081) GN=lpp PE=3 SV=1       | A1JPB4_YERE8     |
| Elongation factor Tu 1 OS=Yersinia enterocolitica serotype O:8 / biotype 1B (strain 8081) GN=tuf1 PE=3 SV=1                | EFTU1_YERE8      |
| 30S ribosomal protein S3 OS=Yersinia enterocolitica serotype O:8 / biotype 1B (strain 8081) GN=rpsC PE=3 SV=1              | RS3_YERE8        |
| 2,3-bisphosphoglycerate-dependent phosphoglycerate mutase OS=Yersinia enterocolitica serotype O:8 / biotype 1B             | GPMA_YERE8       |

|                                                                                                                                  |                  |
|----------------------------------------------------------------------------------------------------------------------------------|------------------|
| (strain 8081) GN=gpmA PE=3 SV=1                                                                                                  |                  |
| Elongation factor Tu (Fragment) OS=Yersinia enterocolitica GN=tuf PE=4 SV=1                                                      | D1MWR3_YEREN     |
| Elongation factor Tu A (Fragment) OS=Yersinia enterocolitica GN=tufA PE=4 SV=1                                                   | B6RBB1_YEREN     |
| Pseudouridine synthase OS=Yersinia enterocolitica serotype O:8 / biotype 1B (strain 8081) GN=rLuA PE=3 SV=1                      | A1JF9_YERE8      |
| Putative uncharacterized protein OS=Yersinia enterocolitica serotype O:8 / biotype 1B (strain 8081) GN=YE3042 PE=4 SV=1          | A1JNW8_YERE8     |
| Primosomal protein n' OS=Yersinia enterocolitica serotype O:8 / biotype 1B (strain 8081) GN=priA PE=4 SV=1                       | A1J12_YERE8      |
| Translocator protein OS=Yersinia enterocolitica serotype O:8 / biotype 1B (strain 8081) GN=yopD PE=4 SV=1                        | A1JU70_YERE8     |
| 50S ribosomal protein L15 OS=Yersinia enterocolitica serotype O:8 / biotype 1B (strain 8081) GN=rplO PE=3 SV=1                   | RL15_YERE8       |
| <b>Pulsed AnI labeling, 60-90 min</b>                                                                                            | Accession Number |
| Tyrosine-protein phosphatase yopH OS=Yersinia enterocolitica GN=yopH PE=1 SV=1                                                   | YOPH_YEREN       |
| Outer membrane virulence protein yopE OS=Yersinia enterocolitica GN=yopE PE=2 SV=1                                               | YOPE_YEREN       |
| 60 kDa chaperonin OS=Yersinia enterocolitica serotype O:8 / biotype 1B (strain 8081) GN=grl PE=3 SV=1                            | CH60_YERE8       |
| YopD OS=Yersinia enterocolitica GN=yopD PE=4 SV=1                                                                                | D0FH99_YEREN     |
| Yop effector YopP OS=Yersinia enterocolitica GN=yopP PE=4 SV=1                                                                   | O52162_YEREN     |
| Elongation factor Tu 1 OS=Yersinia enterocolitica serotype O:8 / biotype 1B (strain 8081) GN=tuf1 PE=3 SV=1                      | EFTU1_YERE8      |
| Elongation factor Tu 2 OS=Yersinia enterocolitica serotype O:8 / biotype 1B (strain 8081) GN=tuf2 PE=3 SV=1                      | EFTU2_YERE8      |
| 30S ribosomal protein S3 OS=Yersinia enterocolitica serotype O:8 / biotype 1B (strain 8081) GN=rpsC PE=3 SV=1                    | RS3_YERE8        |
| YopN OS=Yersinia enterocolitica GN=yopN PE=4 SV=1                                                                                | O68333_YEREN     |
| Type III secretion outer membrane protein OS=Yersinia enterocolitica serotype O:8 / biotype 1B (strain 8081) GN=yopN PE=4 SV=1   | A1JU81_YERE8     |
| Chaperone protein dnaK OS=Yersinia enterocolitica serotype O:8 / biotype 1B (strain 8081) GN=dnaK PE=2 SV=1                      | DNAK_YERE8       |
| Elongation factor Tu (Fragment) OS=Yersinia enterocolitica GN=tuf PE=4 SV=1                                                      | D1MWR3_YEREN     |
| 50S ribosomal protein L1 OS=Yersinia enterocolitica serotype O:8 / biotype 1B (strain 8081) GN=rplA PE=3 SV=1                    | RL1_YERE8        |
| Glyceraldehyde 3-phosphate dehydrogenase A OS=Yersinia enterocolitica serotype O:8 / biotype 1B (strain 8081) GN=gapA PE=3 SV=1  | A1JQH1_YERE8     |
| 30S ribosomal protein S5 OS=Yersinia enterocolitica serotype O:8 / biotype 1B (strain 8081) GN=rpsE PE=3 SV=1                    | RS5_YERE8        |
| Pseudouridine synthase OS=Yersinia enterocolitica serotype O:8 / biotype 1B (strain 8081) GN=rLuA PE=3 SV=1                      | A1JF9_YERE8      |
| Putative exported protein OS=Yersinia enterocolitica serotype O:8 / biotype 1B (strain 8081) GN=YE3039 PE=3 SV=1                 | A1JP43_YERE8     |
| Elongation factor Ts OS=Yersinia enterocolitica serotype O:8 / biotype 1B (strain 8081) GN=tsf PE=3 SV=1                         | EFTS_YERE8       |
| Flagellar basal-body rod protein flgB OS=Yersinia enterocolitica GN=flgB PE=3 SV=3                                               | FLGB_YEREN       |
| Putative exported protein OS=Yersinia enterocolitica serotype O:8 / biotype 1B (strain 8081) GN=YE1132 PE=3 SV=1                 | A1JL02_YERE8     |
| 30S ribosomal protein S8 OS=Yersinia enterocolitica serotype O:8 / biotype 1B (strain 8081) GN=rpsH PE=3 SV=1                    | RS8_YERE8        |
| Major outer membrane lipoprotein OS=Yersinia enterocolitica serotype O:8 / biotype 1B (strain 8081) GN=lpp PE=3 SV=1             | A1JPB4_YERE8     |
| Putative prophage integrase OS=Yersinia enterocolitica serotype O:8 / biotype 1B (strain 8081) GN=YE0993 PE=4 SV=1               | A1JKH9_YERE8     |
| PduX OS=Yersinia enterocolitica serotype O:8 / biotype 1B (strain 8081) GN=pduX PE=4 SV=1                                        | A1JSN3_YERE8     |
| Yop effector YopM OS=Yersinia enterocolitica GN=yopM PE=4 SV=1                                                                   | P74988_YEREN     |
| Putative methyl-accepting chemotaxis protein OS=Yersinia enterocolitica serotype O:8 / biotype 1B (strain 8081) GN=aer PE=4 SV=1 | A1JLQ5_YERE8     |
| 50S ribosomal protein L5 OS=Yersinia enterocolitica serotype O:8 / biotype 1B (strain 8081) GN=rplE PE=3 SV=1                    | RL5_YERE8        |
| Arginine transport system permease protein OS=Yersinia enterocolitica serotype O:8 / biotype 1B (strain 8081) GN=artM PE=3 SV=1  | A1JM76_YERE8     |
| Primosomal protein n' OS=Yersinia enterocolitica serotype O:8 / biotype 1B (strain 8081) GN=priA PE=4 SV=1                       | A1J12_YERE8      |
| <b>Pulsed AnI labeling, 90-180 min</b>                                                                                           | Accession Number |

|                                                                                                                                                                      |              |
|----------------------------------------------------------------------------------------------------------------------------------------------------------------------|--------------|
| Tyrosine-protein phosphatase yopH OS=Yersinia enterocolitica GN=yopH PE=1 SV=1                                                                                       | YOPH_YEREN   |
| Outer membrane virulence protein yopE OS=Yersinia enterocolitica GN=yopE PE=2 SV=1                                                                                   | YOPE_YEREN   |
| 60 kDa chaperonin OS=Yersinia enterocolitica serotype O:8 / biotype 1B (strain 8081) GN=groL PE=3 SV=1                                                               | CH60_YERE8   |
| Protein yopD OS=Yersinia enterocolitica GN=yopD PE=4 SV=1                                                                                                            | YOPD_YEREN   |
| Putative outer membrane virulence protein OS=Yersinia enterocolitica serotype O:8 / biotype 1B (strain 8081) GN=YEP0053 PE=3 SV=1                                    | A1JUA9_YERE8 |
| Translocator protein OS=Yersinia enterocolitica serotype O:8 / biotype 1B (strain 8081) GN=yopD PE=4 SV=1                                                            | A1JU70_YERE8 |
| Yop effector YopP OS=Yersinia enterocolitica GN=yopP PE=4 SV=1                                                                                                       | O52162_YEREN |
| YopN OS=Yersinia enterocolitica GN=yopN PE=4 SV=1                                                                                                                    | O68333_YEREN |
| Elongation factor Tu 1 OS=Yersinia enterocolitica serotype O:8 / biotype 1B (strain 8081) GN=tuf1 PE=3 SV=1                                                          | EFTU1_YERE8  |
| Type III secretion system effector protein (Putative targeted effector protein) OS=Yersinia enterocolitica serotype O:8 / biotype 1B (strain 8081) GN=yopJ PE=4 SV=1 | A1JUC5_YERE8 |
| Type III secretion outer membrane protein OS=Yersinia enterocolitica serotype O:8 / biotype 1B (strain 8081) GN=yopN PE=4 SV=1                                       | A1JU81_YERE8 |
| Yop effector YopM OS=Yersinia enterocolitica GN=yopM PE=4 SV=1                                                                                                       | P74988_YEREN |
| Putative exported protein OS=Yersinia enterocolitica serotype O:8 / biotype 1B (strain 8081) GN=cpxP PE=3 SV=1                                                       | A1JHZ1_YERE8 |
| Attachment invasion locus protein (Fragment) OS=Yersinia enterocolitica (type O:3) GN=ail PE=4 SV=1                                                                  | Q4ZJF6_YEREN |
| Protein yopQ OS=Yersinia enterocolitica GN=yopQ PE=4 SV=1                                                                                                            | YOPQ_YEREN   |
| Protein kinase YopO OS=Yersinia enterocolitica GN=yopO PE=4 SV=1                                                                                                     | O85239_YEREN |
| Chaperone protein htpG OS=Yersinia enterocolitica serotype O:8 / biotype 1B (strain 8081) GN=htpG PE=3 SV=1                                                          | HTPG_YERE8   |
| Chaperone protein dnaK OS=Yersinia enterocolitica serotype O:8 / biotype 1B (strain 8081) GN=dnaK PE=2 SV=1                                                          | DNAK_YERE8   |
| Major outer membrane lipoprotein OS=Yersinia enterocolitica serotype O:8 / biotype 1B (strain 8081) GN=lpp PE=3 SV=1                                                 | A1JPB4_YERE8 |
| Elongation factor Tu A (Fragment) OS=Yersinia enterocolitica GN=tufA PE=4 SV=1                                                                                       | B6RBB1_YEREN |
| 2,3-bisphosphoglycerate-dependent phosphoglycerate mutase OS=Yersinia enterocolitica serotype O:8 / biotype 1B (strain 8081) GN=gpmA PE=3 SV=1                       | GPMA_YERE8   |
| ORF protein (Fragment) OS=Yersinia enterocolitica GN=ORF PE=4 SV=1                                                                                                   | Q56881_YEREN |
| Protein yopB OS=Yersinia enterocolitica GN=yopB PE=4 SV=1                                                                                                            | YOPB_YEREN   |
| Virulence-associated V antigen OS=Yersinia enterocolitica serotype O:8 / biotype 1B (strain 8081) GN=lcrV PE=4 SV=1                                                  | A1JU73_YERE8 |
| Regulatory protein OS=Yersinia enterocolitica serotype O:8 / biotype 1B (strain 8081) GN=yscM2 PE=4 SV=1                                                             | A1JUC6_YERE8 |
| 30S ribosomal protein S3 OS=Yersinia enterocolitica serotype O:8 / biotype 1B (strain 8081) GN=rpsC PE=3 SV=1                                                        | RS3_YERE8    |
| Peptidoglycan-associated lipoprotein Pal OS=Yersinia enterocolitica serotype O:8 / biotype 1B (strain 8081) GN=pal PE=3 SV=1                                         | A1JRK6_YERE8 |
| Outer membrane porin protein OS=Yersinia enterocolitica serotype O:8 / biotype 1B (strain 8081) GN=YE2463 PE=4 SV=1                                                  | A1JS30_YERE8 |
| 50S ribosomal protein L1 OS=Yersinia enterocolitica serotype O:8 / biotype 1B (strain 8081) GN=rplA PE=3 SV=1                                                        | RL1_YERE8    |
| Global stress requirement protein GsrA OS=Yersinia enterocolitica serotype O:8 / biotype 1B (strain 8081) GN=gsrA PE=3 SV=1                                          | A1JJQ8_YERE8 |
| Enolase OS=Yersinia enterocolitica serotype O:8 / biotype 1B (strain 8081) GN=eno PE=3 SV=1                                                                          | ENO_YERE8    |
| Putative alkyl hydroperoxide reductase subunit c OS=Yersinia enterocolitica serotype O:8 / biotype 1B (strain 8081) GN=ahpC PE=4 SV=1                                | A1JNT6_YERE8 |
| Putative exported protein OS=Yersinia enterocolitica serotype O:8 / biotype 1B (strain 8081) GN=YE3039 PE=3 SV=1                                                     | A1JP43_YERE8 |
| Yop proteins translocation protein M OS=Yersinia enterocolitica GN=yscM PE=2 SV=1                                                                                    | YSCM_YEREN   |
| Pseudouridine synthase OS=Yersinia enterocolitica serotype O:8 / biotype 1B (strain 8081) GN=rLuA PE=3 SV=1                                                          | A1JF9_YERE8  |
| Protein tolB OS=Yersinia enterocolitica serotype O:8 / biotype 1B (strain 8081) GN=tolB PE=3 SV=1                                                                    | TOLB_YERE8   |
| Elongation factor Ts OS=Yersinia enterocolitica serotype O:8 / biotype 1B (strain 8081) GN=tsf PE=3 SV=1                                                             | EFTS_YERE8   |
| Putative transcription accessory protein OS=Yersinia enterocolitica serotype O:8 / biotype 1B (strain 8081) GN=teX PE=4 SV=1                                         | A1JSG5_YERE8 |

|                                                                                                                                                   |                  |
|---------------------------------------------------------------------------------------------------------------------------------------------------|------------------|
| DNA-directed RNA polymerase subunit beta' OS=Yersinia enterocolitica serotype O:8 / biotype 1B (strain 8081) GN=rpoC PE=3 SV=1                    | RPOC_YERE8       |
| Gluconate utilization system Gnt-I transcriptional repressor OS=Yersinia enterocolitica serotype O:8 / biotype 1B (strain 8081) GN=gntR PE=4 SV=1 | A1JSK2_YERE8     |
| LysR-family transcriptional regulatory protein OS=Yersinia enterocolitica serotype O:8 / biotype 1B (strain 8081) GN=YE3720 PE=4 SV=1             | A1JR54_YERE8     |
| Ni/Fe-hydrogenase 2 b-type cytochrome subunit OS=Yersinia enterocolitica serotype O:8 / biotype 1B (strain 8081) GN=hybB PE=4 SV=1                | A1JQK5_YERE8     |
| PduX OS=Yersinia enterocolitica serotype O:8 / biotype 1B (strain 8081) GN=pduX PE=4 SV=1                                                         | A1JSN3_YERE8     |
| Putative methyl-accepting chemotaxis protein OS=Yersinia enterocolitica serotype O:8 / biotype 1B (strain 8081) GN=aer PE=4 SV=1                  | A1JLQ5_YERE8     |
| Recombinase OS=Yersinia enterocolitica GN=ORF2 PE=4 SV=1                                                                                          | Q70W49_YEREN     |
| Probable terminase, ATPase subunit OS=Yersinia enterocolitica serotype O:8 / biotype 1B (strain 8081) GN=gpP PE=4 SV=1                            | A1JN14_YERE8     |
| Protease OS=Yersinia enterocolitica serotype O:8 / biotype 1B (strain 8081) GN=degQ PE=3 SV=1                                                     | A1JR98_YERE8     |
| Glyceraldehyde 3-phosphate dehydrogenase A OS=Yersinia enterocolitica serotype O:8 / biotype 1B (strain 8081) GN=gapA PE=3 SV=1                   | A1JQH1_YERE8     |
| Putative exported protein OS=Yersinia enterocolitica serotype O:8 / biotype 1B (strain 8081) GN=yacK PE=3 SV=1                                    | A1JN0_YERE8      |
| <b>Secretion Wt Injected Proteins Gentamicin</b>                                                                                                  | Accession Number |
| Yop effector YopE OS=Yersinia enterocolitica GN=yopE PE=4 SV=1                                                                                    | Q7BRY7_YEREN     |
| Yop effector YopH OS=Yersinia enterocolitica GN=yopH PE=4 SV=1                                                                                    | Q7BRY8_YEREN     |
| LcrV OS=Yersinia enterocolitica GN=lcrV PE=4 SV=1                                                                                                 | O87495_YEREN     |
| Elongation factor Tu 1 OS=Yersinia enterocolitica serotype O:8 / biotype 1B (strain 8081) GN=tuf1 PE=3 SV=1                                       | EFTU1_YERE8      |
| Translocator protein OS=Yersinia enterocolitica serotype O:8 / biotype 1B (strain 8081) GN=yopD PE=4 SV=1                                         | A1JU70_YERE8     |
| Chaperone protein dnaK OS=Yersinia enterocolitica serotype O:8 / biotype 1B (strain 8081) GN=dnaK PE=2 SV=1                                       | DNAK_YERE8       |
| 60 kDa chaperonin OS=Yersinia enterocolitica serotype O:8 / biotype 1B (strain 8081) GN=groL PE=3 SV=1                                            | CH60_YERE8       |
| Chaperone protein htpG OS=Yersinia enterocolitica serotype O:8 / biotype 1B (strain 8081) GN=htpG PE=3 SV=1                                       | HTPG_YERE8       |
| YopN OS=Yersinia enterocolitica GN=yopN PE=4 SV=1                                                                                                 | O68333_YEREN     |
| Elongation factor Tu A (Fragment) OS=Yersinia enterocolitica GN=tufA PE=4 SV=1                                                                    | B6RBB1_YEREN     |
| Elongation factor G OS=Yersinia enterocolitica serotype O:8 / biotype 1B (strain 8081) GN=fusA PE=3 SV=1                                          | A1JS54_YERE8     |
| Methionyl-tRNA synthetase OS=Yersinia enterocolitica serotype O:8 / biotype 1B (strain 8081) GN=metG PE=3 SV=1                                    | SYM_YERE8        |
| <b>Secretion Wt Media Secreted Proteins 1</b>                                                                                                     | Accession Number |
| YopD OS=Yersinia enterocolitica GN=yopD PE=4 SV=1                                                                                                 | C5IZG7_YEREN     |
| Putative exported protein OS=Yersinia enterocolitica serotype O:8 / biotype 1B (strain 8081) GN=YE2166 PE=3 SV=1                                  | A1JPB8_YERE8     |
| Yop effector YopE OS=Yersinia enterocolitica GN=yopE PE=4 SV=1                                                                                    | Q7BRY7_YEREN     |
| Putative outer membrane porin A protein OS=Yersinia enterocolitica serotype O:8 / biotype 1B (strain 8081) GN=ompA PE=3 SV=1                      | A1JMT3_YERE8     |
| Putative exported protein OS=Yersinia enterocolitica serotype O:8 / biotype 1B (strain 8081) GN=cpxP PE=3 SV=1                                    | A1JHZ1_YERE8     |
| LcrV OS=Yersinia enterocolitica GN=lcrV PE=4 SV=1                                                                                                 | O87495_YEREN     |
| Putative exported protein OS=Yersinia enterocolitica serotype O:8 / biotype 1B (strain 8081) GN=YE2930 PE=3 SV=1                                  | A1JRP4_YERE8     |
| Protein tolB OS=Yersinia enterocolitica serotype O:8 / biotype 1B (strain 8081) GN=tolB PE=3 SV=1                                                 | TOLB_YERE8       |
| Putative D-ribose-binding periplasmic protein OS=Yersinia enterocolitica serotype O:8 / biotype 1B (strain 8081) GN=rbsB PE=3 SV=1                | A1JHS3_YERE8     |
| Arginine-binding periplasmic protein 1 OS=Yersinia enterocolitica serotype O:8 / biotype 1B (strain 8081) GN=artI PE=3 SV=1                       | A1JM82_YERE8     |
| Branched-chain amino acid-binding protein OS=Yersinia enterocolitica serotype O:8 / biotype 1B (strain 8081) GN=livK PE=3 SV=1                    | A1JIC6_YERE8     |
| Secreted thiol:disulfide interchange protein DsbA OS=Yersinia enterocolitica serotype O:8 / biotype 1B (strain 8081) GN=dsbA PE=3 SV=1            | A1JHT2_YERE8     |
| Yop effector YopH OS=Yersinia enterocolitica GN=yopH PE=4 SV=1                                                                                    | Q7BRY8_YEREN     |

|                                                                                                                                        |                  |
|----------------------------------------------------------------------------------------------------------------------------------------|------------------|
| Putative exported protein OS=Yersinia enterocolitica serotype O:8 / biotype 1B (strain 8081) GN=YE3039 PE=3 SV=1                       | A1JP43_YERE8     |
| Putative exported protein OS=Yersinia enterocolitica serotype O:8 / biotype 1B (strain 8081) GN=YE3727 PE=3 SV=1                       | A1JR71_YERE8     |
| Iron(III)-binding periplasmic protein OS=Yersinia enterocolitica serotype O:8 / biotype 1B (strain 8081) GN=yfuA PE=3 SV=1             | A1JLH5_YERE8     |
| YopB OS=Yersinia enterocolitica GN=yopB PE=4 SV=1                                                                                      | C5IZG6_YEREN     |
| Putrescine-binding periplasmic protein OS=Yersinia enterocolitica serotype O:8 / biotype 1B (strain 8081) GN=potF PE=3 SV=1            | A1JM59_YERE8     |
| Outer-membrane lipoprotein carrier protein OS=Yersinia enterocolitica serotype O:8 / biotype 1B (strain 8081) GN=lolA PE=3 SV=1        | LOLA_YERE8       |
| Cationic 19 kDa outer membrane protein OS=Yersinia enterocolitica serotype O:8 / biotype 1B (strain 8081) GN=ompH PE=3 SV=1            | A1JP72_YERE8     |
| Peptidoglycan-associated lipoprotein Pal OS=Yersinia enterocolitica serotype O:8 / biotype 1B (strain 8081) GN=pal PE=3 SV=1           | A1JRK6_YERE8     |
| Putative exported protein OS=Yersinia enterocolitica serotype O:8 / biotype 1B (strain 8081) GN=YE2080 PE=3 SV=1                       | A1JN51_YERE8     |
| Periplasmic dipeptide transport protein OS=Yersinia enterocolitica serotype O:8 / biotype 1B (strain 8081) GN=dppA PE=3 SV=1           | A1JSV0_YERE8     |
| <b>Secretion Wt Media Secreted Proteins 2</b>                                                                                          | Accession Number |
| YopD OS=Yersinia enterocolitica GN=yopD PE=4 SV=1                                                                                      | C5IZG7_YEREN     |
| Yop effector YopH OS=Yersinia enterocolitica GN=yopH PE=4 SV=1                                                                         | Q7BRY8_YEREN     |
| Beta-lactamase OS=Yersinia enterocolitica serotype O:8 / biotype 1B (strain 8081) GN=ampC PE=4 SV=1                                    | A1JRW9_YERE8     |
| LcrV OS=Yersinia enterocolitica GN=lcrV PE=4 SV=1                                                                                      | O87495_YEREN     |
| Yop effector YopE OS=Yersinia enterocolitica GN=yopE PE=4 SV=1                                                                         | Q7BRY7_YEREN     |
| YopB OS=Yersinia enterocolitica GN=yopB PE=4 SV=1                                                                                      | C5IZG6_YEREN     |
| Branched-chain amino acid-binding protein OS=Yersinia enterocolitica serotype O:8 / biotype 1B (strain 8081) GN=livK PE=3 SV=1         | A1JIC6_YERE8     |
| Putative type III secretion protein OS=Yersinia enterocolitica serotype O:8 / biotype 1B (strain 8081) GN=yscH PE=3 SV=1               | A1JU99_YERE8     |
| Putative exported protein OS=Yersinia enterocolitica serotype O:8 / biotype 1B (strain 8081) GN=cpxP PE=3 SV=1                         | A1JHZ1_YERE8     |
| Putative exported protein OS=Yersinia enterocolitica serotype O:8 / biotype 1B (strain 8081) GN=YE2166 PE=3 SV=1                       | A1JPB8_YERE8     |
| YscP OS=Yersinia enterocolitica (type O:2.3) GN=yscP PE=4 SV=1                                                                         | B6DX70_YEREN     |
| Secreted thiol:disulfide interchange protein DsbA OS=Yersinia enterocolitica serotype O:8 / biotype 1B (strain 8081) GN=dsbA PE=3 SV=1 | A1JHT2_YERE8     |
| Periplasmic dipeptide transport protein OS=Yersinia enterocolitica serotype O:8 / biotype 1B (strain 8081) GN=dppA PE=3 SV=1           | A1JSV0_YERE8     |
| 60 kDa chaperonin OS=Yersinia enterocolitica serotype O:8 / biotype 1B (strain 8081) GN=groL PE=3 SV=1                                 | CH60_YERE8       |
| Elongation factor Tu 1 OS=Yersinia enterocolitica serotype O:8 / biotype 1B (strain 8081) GN=tuf1 PE=3 SV=1                            | EFTU1_YERE8      |
| Maltose-binding periplasmic protein OS=Yersinia enterocolitica serotype O:8 / biotype 1B (strain 8081) GN=malE PE=3 SV=1               | A1JRV3_YERE8     |
| Periplasmic oligopeptide-binding protein OS=Yersinia enterocolitica serotype O:8 / biotype 1B (strain 8081) GN=oppA PE=3 SV=1          | A1JQ72_YERE8     |
| Putative D-ribose-binding periplasmic protein OS=Yersinia enterocolitica serotype O:8 / biotype 1B (strain 8081) GN=rbsB PE=3 SV=1     | A1JHS3_YERE8     |
| <b>Secretion Wt Media Secreted Proteins 3</b>                                                                                          | Accession Number |
| YopD OS=Yersinia enterocolitica GN=yopD PE=4 SV=1                                                                                      | C5IZG7_YEREN     |
| Yop effector YopH OS=Yersinia enterocolitica GN=yopH PE=4 SV=1                                                                         | Q7BRY8_YEREN     |
| Yop effector YopE OS=Yersinia enterocolitica GN=yopE PE=4 SV=1                                                                         | Q7BRY7_YEREN     |
| Putative exported protein OS=Yersinia enterocolitica serotype O:8 / biotype 1B (strain 8081) GN=cpxP PE=3 SV=1                         | A1JHZ1_YERE8     |
| Beta-lactamase OS=Yersinia enterocolitica serotype O:8 / biotype 1B (strain 8081) GN=ampC PE=4 SV=1                                    | A1JRW9_YERE8     |
| Global stress requirement protein GsrA OS=Yersinia enterocolitica serotype O:8 / biotype 1B (strain 8081) GN=gsrA PE=3 SV=1            | A1JJQ8_YERE8     |
| YopB OS=Yersinia enterocolitica GN=yopB PE=4 SV=1                                                                                      | C5IZG6_YEREN     |

|                                                                                                                                        |                  |
|----------------------------------------------------------------------------------------------------------------------------------------|------------------|
| Putative outer membrane porin A protein OS=Yersinia enterocolitica serotype O:8 / biotype 1B (strain 8081) GN=ompA PE=3 SV=1           | A1JMT3_YERE8     |
| Putative exported protein OS=Yersinia enterocolitica serotype O:8 / biotype 1B (strain 8081) GN=YE3039 PE=3 SV=1                       | A1JP43_YERE8     |
| Putative type III secretion protein OS=Yersinia enterocolitica serotype O:8 / biotype 1B (strain 8081) GN=yscH PE=3 SV=1               | A1JU99_YERE8     |
| Protease OS=Yersinia enterocolitica serotype O:8 / biotype 1B (strain 8081) GN=degQ PE=3 SV=1                                          | A1JR98_YERE8     |
| 50S ribosomal protein L9 OS=Yersinia enterocolitica serotype O:8 / biotype 1B (strain 8081) GN=rplI PE=3 SV=1                          | RL9_YERE8        |
| 3-oxoacyl-[acyl-carrier-protein] synthase I OS=Yersinia enterocolitica serotype O:8 / biotype 1B (strain 8081) GN=fabB PE=3 SV=1       | A1JKM0_YERE8     |
| Outer membrane porin protein OS=Yersinia enterocolitica serotype O:8 / biotype 1B (strain 8081) GN=YE2463 PE=4 SV=1                    | A1JS30_YERE8     |
| 50S ribosomal protein L1 OS=Yersinia enterocolitica serotype O:8 / biotype 1B (strain 8081) GN=rplA PE=3 SV=1                          | RL1_YERE8        |
| Putative exported protein OS=Yersinia enterocolitica serotype O:8 / biotype 1B (strain 8081) GN=YE2166 PE=3 SV=1                       | A1JPB8_YERE8     |
| <b>Secretion Mut Media Secreted Proteins 1</b>                                                                                         | Accession Number |
| Branched-chain amino acid-binding protein OS=Yersinia enterocolitica serotype O:8 / biotype 1B (strain 8081) GN=livK PE=3 SV=1         | A1JIC6_YERE8     |
| Putative exported protein OS=Yersinia enterocolitica serotype O:8 / biotype 1B (strain 8081) GN=cpxP PE=3 SV=1                         | A1JHZ1_YERE8     |
| Putative exported protein OS=Yersinia enterocolitica serotype O:8 / biotype 1B (strain 8081) GN=YE2166 PE=3 SV=1                       | A1JPB8_YERE8     |
| Putative outer membrane porin A protein OS=Yersinia enterocolitica serotype O:8 / biotype 1B (strain 8081) GN=ompA PE=3 SV=1           | A1JMT3_YERE8     |
| Protein tolB OS=Yersinia enterocolitica serotype O:8 / biotype 1B (strain 8081) GN=tolB PE=3 SV=1                                      | TOLB_YERE8       |
| Putative D-ribose-binding periplasmic protein OS=Yersinia enterocolitica serotype O:8 / biotype 1B (strain 8081) GN=rbsB PE=3 SV=1     | A1JHS3_YERE8     |
| Putative exported protein OS=Yersinia enterocolitica serotype O:8 / biotype 1B (strain 8081) GN=YE3039 PE=3 SV=1                       | A1JP43_YERE8     |
| Secreted thiol:disulfide interchange protein DsbA OS=Yersinia enterocolitica serotype O:8 / biotype 1B (strain 8081) GN=dsbA PE=3 SV=1 | A1JHT2_YERE8     |
| Putative exported protein OS=Yersinia enterocolitica serotype O:8 / biotype 1B (strain 8081) GN=YE2930 PE=3 SV=1                       | A1JRP4_YERE8     |
| Osmotically inducible protein Y OS=Yersinia enterocolitica serotype O:8 / biotype 1B (strain 8081) GN=osmY PE=3 SV=1                   | A1JJ93_YERE8     |
| Putrescine-binding periplasmic protein OS=Yersinia enterocolitica serotype O:8 / biotype 1B (strain 8081) GN=potF PE=3 SV=1            | A1JM59_YERE8     |
| <b>Secretion Mut Media Secreted Proteins 2</b>                                                                                         | Accession Number |
| FliC OS=Yersinia enterocolitica GN=fliC PE=4 SV=1                                                                                      | C9EHF4_YEREN     |
| Flagellar hook-associated protein 1 OS=Yersinia enterocolitica serotype O:8 / biotype 1B (strain 8081) GN=flgK PE=3 SV=1               | A1JSZ7_YERE8     |
| Flagellar hook-associated protein 2 OS=Yersinia enterocolitica serotype O:8 / biotype 1B (strain 8081) GN=fliD PE=4 SV=1               | A1JSR2_YERE8     |
| 60 kDa chaperonin OS=Yersinia enterocolitica serotype O:8 / biotype 1B (strain 8081) GN=groL PE=3 SV=1                                 | CH60_YERE8       |
| Global stress requirement protein GsrA OS=Yersinia enterocolitica serotype O:8 / biotype 1B (strain 8081) GN=gsrA PE=3 SV=1            | A1JJQ8_YERE8     |
| Putative exported protein OS=Yersinia enterocolitica serotype O:8 / biotype 1B (strain 8081) GN=cpxP PE=3 SV=1                         | A1JHZ1_YERE8     |
| 3-oxoacyl-[acyl-carrier protein] reductase OS=Yersinia enterocolitica serotype O:8 / biotype 1B (strain 8081) GN=fabG PE=3 SV=1        | A1JN73_YERE8     |
| 3-oxoacyl-[acyl-carrier-protein] synthase I OS=Yersinia enterocolitica serotype O:8 / biotype 1B (strain 8081) GN=fabB PE=3 SV=1       | A1JKM0_YERE8     |
| 50S ribosomal protein L9 OS=Yersinia enterocolitica serotype O:8 / biotype 1B (strain 8081) GN=rplI PE=3 SV=1                          | RL9_YERE8        |
| Glyceraldehyde 3-phosphate dehydrogenase A OS=Yersinia enterocolitica serotype O:8 / biotype 1B (strain 8081) GN=gapA PE=3 SV=1        | A1JQH1_YERE8     |
| Elongation factor Tu A (Fragment) OS=Yersinia enterocolitica GN=tufA PE=4 SV=1                                                         | B6RBB1_YEREN     |
| 50S ribosomal protein L10 OS=Yersinia enterocolitica serotype O:8 / biotype 1B (strain 8081) GN=rplJ PE=3 SV=1                         | RL10_YERE8       |
| FliC3 OS=Yersinia enterocolitica GN=fliC3 PE=4 SV=1                                                                                    | C9EHF3_YEREN     |
| 30S ribosomal protein S3 OS=Yersinia enterocolitica serotype O:8 / biotype 1B (strain 8081) GN=rpsC PE=3 SV=1                          | RS3_YERE8        |
| <b>Secretion Mut Media Secreted Proteins 3</b>                                                                                         | Accession Number |
| 60 kDa chaperonin OS=Yersinia enterocolitica serotype O:8 / biotype 1B (strain 8081) GN=groL PE=3 SV=1                                 | CH60_YERE8       |



|                                                                                                                                 |              |
|---------------------------------------------------------------------------------------------------------------------------------|--------------|
| Global stress requirement protein GsrA OS=Yersinia enterocolitica serotype O:8 / biotype 1B (strain 8081) GN=gsrA PE=3 SV=1     | A1JQ8_YERE8  |
| Putative exported protein OS=Yersinia enterocolitica serotype O:8 / biotype 1B (strain 8081) GN=cpxP PE=3 SV=1                  | A1JH21_YERE8 |
| Elongation factor Tu 1 OS=Yersinia enterocolitica serotype O:8 / biotype 1B (strain 8081) GN=tuf1 PE=3 SV=1                     | EFTU1_YERE8  |
| Glyceraldehyde 3-phosphate dehydrogenase A OS=Yersinia enterocolitica serotype O:8 / biotype 1B (strain 8081) GN=gapA PE=3 SV=1 | A1JQH1_YERE8 |
